# Supplementary material for: Methanol-to-hydrocarbons conversion over MoO3/H-ZSM-5 catalysts prepared via lower temperature calcination: a route to tailor the distribution and evolution of promoter Mo species, and their corresponding catalytic properties
Source: Chem Sci. 2015 Jun 11;6(9):5152–63. doi: 10.1039/c5sc01825k (PMC5667184; doi:10.1039/c5sc01825k)
Supplement: Supplementary file 1 [file SC-006-C5SC01825K-s001.c3xml]

<?xml version="1.0" encoding="UTF-8" ?>

<C3XML

 version="14.0"

><model

 id="1"

 showAtomSymbol="Hide"

 showAtomSerialNumber="Hide"

 showAtomDots="Hide"

 objectDisplayMode="BallAndStick"

 colorByMode="ColorByElement"

 backgroundColor="0xffff8000"

 backgroundShape="10"

 backgroundShapeColor="0xff000000"

 backgroundPicAlign="0"

 backgroundPicOffset="0 0"

 backgroundPicAlpha="255"

 backgroundPicTransparent="no"

 backgroundPicTransColor="0xffffffff"

 selectedColor="0xff00ffff"

 alphaHelixColor="0xffff5780"

 betaSheetColor="0xffc00024"

 coilColor="0xffff57c0"

 nucleicAcidColor="0xffc0c000"

 labelFontName="Times New Roman"

 labelFontSize="12"

 labelFontColor="0xff00ff00"

 sphereSizeBy="SizeByRadius"

 sphereSizeScale="25"

 dotsSizeBy="SizeByRadius"

 dotsDensity="50"

 buildingAutoRectify="yes"

 buildingAutoCleanupAtomTypes="yes"

 buildingAutoApplyStandards="yes"

 buildingAutoCenter="yes"

 macroMol="no"

 buildingBondProximatePercent="10"

 hydrogenAtomDisplayMode="ShowAllHydrogens"

 hydrogenBondDisplayMode="ShowIntermolecularHydrogenBonds"

 lonePairDisplayMode="ShowAllLonePairs"

 showResidueLabels="no"

 displayDelocalizedSystems="yes"

><view

 id="2"

 viewScaleFactor="12.7857"

 viewWidthPixels="1088"

 viewHeightPixels="437"

 viewTransform=" -0.856793 0.269123 -0.439861 0 -0.495778 -0.195341 0.846195 0 0.141808 0.943088 0.300792 0 0 0 0 1"

 fieldOfView="0.785398"

 stereoMode="Disabled"

 viewFocusCenter="-6.83877 10.3242 -9.60667"

 viewOffset="-0.621526 0.0962524 2.91434e-015"

/><group

 id="3"

 isCollapsed="yes"

 groupName="Main"

><fragment

 id="4"

 groupName="Chain"

 groupID="H"

><group

 id="5"

 groupName="MOL"

 groupID="0 "

><atom

 id="394"

 symbol="O"

 pdbSymbol=" O  "

 userNum="1"

 cartCoords="2.044 7.964 -10.006"

/><atom

 id="398"

 symbol="O"

 pdbSymbol=" O  "

 userNum="2"

 cartCoords="-6.247 17.325 -11.827"

/><atom

 id="402"

 symbol="O"

 pdbSymbol=" O  "

 userNum="3"

 cartCoords="-17.471 11.089 -9.254"

/><atom

 id="406"

 symbol="O"

 pdbSymbol=" O  "

 userNum="4"

 cartCoords="-9.18 1.729 -7.433"

/><atom

 id="410"

 symbol="O"

 pdbSymbol=" O  "

 userNum="5"

 cartCoords="2.83 6.708 -12.103"

/><atom

 id="412"

 symbol="O"

 pdbSymbol=" O  "

 userNum="6"

 cartCoords="-6.785 15.886 -9.769"

/><atom

 id="415"

 symbol="O"

 pdbSymbol=" O  "

 userNum="7"

 cartCoords="-18.258 12.346 -7.157"

/><atom

 id="417"

 symbol="O"

 pdbSymbol=" O  "

 userNum="8"

 cartCoords="-8.642 3.167 -9.491"

/><atom

 id="420"

 symbol="O"

 pdbSymbol=" O  "

 userNum="9"

 cartCoords="-1.016 3.994 -0.856"

/><atom

 id="423"

 symbol="O"

 pdbSymbol=" O  "

 userNum="10"

 cartCoords="-7.441 13.613 -8.657"

/><atom

 id="426"

 symbol="O"

 pdbSymbol=" O  "

 userNum="11"

 cartCoords="-14.411 15.059 -18.404"

/><atom

 id="429"

 symbol="O"

 pdbSymbol=" O  "

 userNum="12"

 cartCoords="-7.987 5.44 -10.602"

/><atom

 id="432"

 symbol="O"

 pdbSymbol=" O  "

 userNum="13"

 cartCoords="3.088 2.54 -11.896"

/><atom

 id="435"

 symbol="O"

 pdbSymbol=" O  "

 userNum="14"

 cartCoords="-6.279 11.749 -10.096"

/><atom

 id="439"

 symbol="O"

 pdbSymbol=" O  "

 userNum="15"

 cartCoords="-18.515 16.513 -7.364"

/><atom

 id="441"

 symbol="O"

 pdbSymbol=" O  "

 userNum="16"

 cartCoords="-9.149 7.304 -9.164"

/><atom

 id="444"

 symbol="O"

 pdbSymbol=" O  "

 userNum="17"

 cartCoords="2.537 2.853 -9.357"

/><atom

 id="448"

 symbol="O"

 pdbSymbol=" O  "

 userNum="18"

 cartCoords="-5.801 12.23 -12.624"

/><atom

 id="452"

 symbol="O"

 pdbSymbol=" O  "

 userNum="19"

 cartCoords="-17.964 16.201 -9.903"

/><atom

 id="456"

 symbol="O"

 pdbSymbol=" O  "

 userNum="20"

 cartCoords="-9.627 6.824 -6.636"

/><atom

 id="460"

 symbol="O"

 pdbSymbol=" O  "

 userNum="21"

 cartCoords="2.461 5.384 -9.897"

/><atom

 id="463"

 symbol="O"

 pdbSymbol=" O  "

 userNum="22"

 cartCoords="-6.187 14.716 -12.01"

/><atom

 id="466"

 symbol="O"

 pdbSymbol=" O  "

 userNum="23"

 cartCoords="-17.889 13.67 -9.362"

/><atom

 id="469"

 symbol="O"

 pdbSymbol=" O  "

 userNum="24"

 cartCoords="-9.24 4.338 -7.249"

/><atom

 id="472"

 symbol="O"

 pdbSymbol=" O  "

 userNum="25"

 cartCoords="-12.568 6.679 -15.504"

/><atom

 id="476"

 symbol="O"

 pdbSymbol=" O  "

 userNum="26"

 cartCoords="-10.12 16.972 -13.457"

/><atom

 id="480"

 symbol="O"

 pdbSymbol=" O  "

 userNum="27"

 cartCoords="-2.86 12.374 -3.756"

/><atom

 id="484"

 symbol="O"

 pdbSymbol=" O  "

 userNum="28"

 cartCoords="-5.308 2.082 -5.803"

/><atom

 id="488"

 symbol="O"

 pdbSymbol=" O  "

 userNum="29"

 cartCoords="-11.417 5.36 -17.371"

/><atom

 id="490"

 symbol="O"

 pdbSymbol=" O  "

 userNum="30"

 cartCoords="-11.006 15.412 -11.632"

/><atom

 id="493"

 symbol="O"

 pdbSymbol=" O  "

 userNum="31"

 cartCoords="-4.01 13.693 -1.889"

/><atom

 id="495"

 symbol="O"

 pdbSymbol=" O  "

 userNum="32"

 cartCoords="-4.422 3.641 -7.628"

/><atom

 id="498"

 symbol="O"

 pdbSymbol=" O  "

 userNum="33"

 cartCoords="-15.814 2.595 -6.353"

/><atom

 id="501"

 symbol="O"

 pdbSymbol=" O  "

 userNum="34"

 cartCoords="-11.11 13.182 -10.291"

/><atom

 id="504"

 symbol="O"

 pdbSymbol=" O  "

 userNum="35"

 cartCoords="0.386 16.458 -12.907"

/><atom

 id="507"

 symbol="O"

 pdbSymbol=" O  "

 userNum="36"

 cartCoords="-4.317 5.872 -8.969"

/><atom

 id="510"

 symbol="O"

 pdbSymbol=" O  "

 userNum="37"

 cartCoords="-10.995 1.027 -17.385"

/><atom

 id="513"

 symbol="O"

 pdbSymbol=" O  "

 userNum="38"

 cartCoords="-10.63 11.076 -11.743"

/><atom

 id="516"

 symbol="O"

 pdbSymbol=" O  "

 userNum="39"

 cartCoords="-4.432 18.026 -1.875"

/><atom

 id="519"

 symbol="O"

 pdbSymbol=" O  "

 userNum="40"

 cartCoords="-4.797 7.977 -7.516"

/><atom

 id="522"

 symbol="O"

 pdbSymbol=" O  "

 userNum="41"

 cartCoords="-12.304 1.527 -15.171"

/><atom

 id="525"

 symbol="O"

 pdbSymbol=" O  "

 userNum="42"

 cartCoords="-9.441 11.87 -13.939"

/><atom

 id="528"

 symbol="O"

 pdbSymbol=" O  "

 userNum="43"

 cartCoords="-3.124 17.526 -4.089"

/><atom

 id="531"

 symbol="O"

 pdbSymbol=" O  "

 userNum="44"

 cartCoords="-5.987 7.184 -5.321"

/><atom

 id="534"

 symbol="O"

 pdbSymbol=" O  "

 userNum="45"

 cartCoords="-12.687 4.071 -15.486"

/><atom

 id="537"

 symbol="O"

 pdbSymbol=" O  "

 userNum="46"

 cartCoords="-9.527 14.431 -13.55"

/><atom

 id="540"

 symbol="O"

 pdbSymbol=" O  "

 userNum="47"

 cartCoords="-2.74 14.982 -3.774"

/><atom

 id="543"

 symbol="O"

 pdbSymbol=" O  "

 userNum="48"

 cartCoords="-5.901 4.623 -5.71"

/><atom

 id="546"

 symbol="O"

 pdbSymbol=" O  "

 userNum="49"

 cartCoords="-14.007 5.401 -17.261"

/><atom

 id="548"

 symbol="O"

 pdbSymbol=" O  "

 userNum="50"

 cartCoords="-8.467 15.928 -11.734"

/><atom

 id="551"

 symbol="O"

 pdbSymbol=" O  "

 userNum="51"

 cartCoords="-1.421 13.652 -1.999"

/><atom

 id="553"

 symbol="O"

 pdbSymbol=" O  "

 userNum="52"

 cartCoords="-6.96 3.126 -7.526"

/><atom

 id="556"

 symbol="O"

 pdbSymbol=" O  "

 userNum="53"

 cartCoords="-13.538 0.581 -17.265"

/><atom

 id="558"

 symbol="O"

 pdbSymbol=" O  "

 userNum="54"

 cartCoords="-8.049 11.105 -11.869"

/><atom

 id="561"

 symbol="O"

 pdbSymbol=" O  "

 userNum="55"

 cartCoords="-1.889 18.472 -1.995"

/><atom

 id="563"

 symbol="O"

 pdbSymbol=" O  "

 userNum="56"

 cartCoords="-7.378 7.948 -7.39"

/><atom

 id="566"

 symbol="O"

 pdbSymbol=" O  "

 userNum="57"

 cartCoords="-0.026 8.491 -8.51"

/><atom

 id="569"

 symbol="O"

 pdbSymbol=" O  "

 userNum="58"

 cartCoords="-4.312 18.263 -13.301"

/><atom

 id="572"

 symbol="O"

 pdbSymbol=" O  "

 userNum="59"

 cartCoords="-15.401 10.562 -10.749"

/><atom

 id="575"

 symbol="O"

 pdbSymbol=" O  "

 userNum="60"

 cartCoords="-11.116 0.79 -5.959"

/><atom

 id="578"

 symbol="O"

 pdbSymbol=" O  "

 userNum="61"

 cartCoords="-16.141 6.648 -14.572"

/><atom

 id="580"

 symbol="O"

 pdbSymbol=" O  "

 userNum="62"

 cartCoords="-6.604 17.62 -14.38"

/><atom

 id="583"

 symbol="O"

 pdbSymbol=" O  "

 userNum="63"

 cartCoords="0.713 12.405 -4.688"

/><atom

 id="585"

 symbol="O"

 pdbSymbol=" O  "

 userNum="64"

 cartCoords="-8.824 1.434 -4.88"

/><atom

 id="588"

 symbol="O"

 pdbSymbol=" O  "

 userNum="65"

 cartCoords="-13.901 7.035 -13.278"

/><atom

 id="591"

 symbol="O"

 pdbSymbol=" O  "

 userNum="66"

 cartCoords="-8.88 17.629 -15.668"

/><atom

 id="594"

 symbol="O"

 pdbSymbol=" O  "

 userNum="67"

 cartCoords="-1.526 12.018 -5.982"

/><atom

 id="597"

 symbol="O"

 pdbSymbol=" O  "

 userNum="68"

 cartCoords="-6.548 1.425 -3.592"

/><atom

 id="600"

 symbol="O"

 pdbSymbol=" O  "

 userNum="69"

 cartCoords="0.377 4.207 -8.838"

/><atom

 id="603"

 symbol="O"

 pdbSymbol=" O  "

 userNum="70"

 cartCoords="-3.926 13.97 -13.097"

/><atom

 id="606"

 symbol="O"

 pdbSymbol=" O  "

 userNum="71"

 cartCoords="-15.805 14.846 -10.422"

/><atom

 id="609"

 symbol="O"

 pdbSymbol=" O  "

 userNum="72"

 cartCoords="-11.501 5.083 -6.162"

/><atom

 id="612"

 symbol="O"

 pdbSymbol=" O  "

 userNum="73"

 cartCoords="2.503 4.576 -7.401"

/><atom

 id="614"

 symbol="O"

 pdbSymbol=" O  "

 userNum="74"

 cartCoords="-6.087 13.986 -14.529"

/><atom

 id="617"

 symbol="O"

 pdbSymbol=" O  "

 userNum="75"

 cartCoords="-17.931 14.477 -11.859"

/><atom

 id="619"

 symbol="O"

 pdbSymbol=" O  "

 userNum="76"

 cartCoords="-9.34 5.067 -4.731"

/><atom

 id="622"

 symbol="O"

 pdbSymbol=" O  "

 userNum="77"

 cartCoords="-13.64 2.873 -13.382"

/><atom

 id="625"

 symbol="O"

 pdbSymbol=" O  "

 userNum="78"

 cartCoords="-8.377 13.487 -15.684"

/><atom

 id="628"

 symbol="O"

 pdbSymbol=" O  "

 userNum="79"

 cartCoords="-1.787 16.181 -5.878"

/><atom

 id="631"

 symbol="O"

 pdbSymbol=" O  "

 userNum="80"

 cartCoords="-7.051 5.566 -3.575"

/><atom

 id="634"

 symbol="O"

 pdbSymbol=" O  "

 userNum="81"

 cartCoords="2.944 0.484 -10.253"

/><atom

 id="636"

 symbol="O"

 pdbSymbol=" O  "

 userNum="82"

 cartCoords="-5.767 9.802 -11.797"

/><atom

 id="7"

 symbol="O"

 pdbSymbol=" O  "

 userNum="83"

 cartCoords="-18.371 18.57 -9.007"

/><atom

 id="10"

 symbol="O"

 pdbSymbol=" O  "

 userNum="84"

 cartCoords="-9.661 9.252 -7.463"

/><atom

 id="15"

 symbol="O"

 pdbSymbol=" O  "

 userNum="85"

 cartCoords="-13.725 19.111 -15.603"

/><atom

 id="18"

 symbol="O"

 pdbSymbol=" O  "

 userNum="86"

 cartCoords="-9.408 9.377 -13.288"

/><atom

 id="23"

 symbol="O"

 pdbSymbol=" O  "

 userNum="87"

 cartCoords="-1.703 -0.057 -3.657"

/><atom

 id="26"

 symbol="O"

 pdbSymbol=" O  "

 userNum="88"

 cartCoords="-6.02 9.676 -5.972"

/><atom

 id="31"

 symbol="O"

 pdbSymbol=" O  "

 userNum="89"

 cartCoords="-11.416 7.704 -13.404"

/><atom

 id="35"

 symbol="O"

 pdbSymbol=" O  "

 userNum="90"

 cartCoords="-11.445 17.829 -15.529"

/><atom

 id="39"

 symbol="O"

 pdbSymbol=" O  "

 userNum="91"

 cartCoords="-4.012 11.349 -5.855"

/><atom

 id="43"

 symbol="O"

 pdbSymbol=" O  "

 userNum="92"

 cartCoords="-3.982 1.224 -3.731"

/><atom

 id="47"

 symbol="O"

 pdbSymbol=" O  "

 userNum="93"

 cartCoords="-11.095 3.188 -13.588"

/><atom

 id="52"

 symbol="O"

 pdbSymbol=" O  "

 userNum="94"

 cartCoords="-10.936 13.327 -15.477"

/><atom

 id="57"

 symbol="O"

 pdbSymbol=" O  "

 userNum="95"

 cartCoords="-4.332 15.865 -5.672"

/><atom

 id="62"

 symbol="O"

 pdbSymbol=" O  "

 userNum="96"

 cartCoords="-4.491 5.726 -3.783"

/><atom

 id="67"

 symbol="O"

 pdbSymbol=" O  "

 userNum="97"

 cartCoords="-14.008 4.498 -6.086"

/><atom

 id="72"

 symbol="O"

 pdbSymbol=" O  "

 userNum="98"

 cartCoords="-13.233 14.73 -10.508"

/><atom

 id="77"

 symbol="O"

 pdbSymbol=" O  "

 userNum="99"

 cartCoords="-1.419 14.555 -13.174"

/><atom

 id="82"

 symbol="O"

 pdbSymbol=" O  "

 userNum="100"

 cartCoords="-2.194 4.323 -8.752"

/><atom

 id="87"

 symbol="O"

 pdbSymbol=" O  "

 userNum="101"

 cartCoords="-13.679 1.054 -6.161"

/><atom

 id="92"

 symbol="O"

 pdbSymbol=" O  "

 userNum="102"

 cartCoords="-12.928 11.283 -10.533"

/><atom

 id="97"

 symbol="O"

 pdbSymbol=" O  "

 userNum="103"

 cartCoords="-1.748 17.999 -13.099"

/><atom

 id="102"

 symbol="O"

 pdbSymbol=" O  "

 userNum="104"

 cartCoords="-2.499 7.77 -8.727"

/><atom

 id="107"

 symbol="O"

 pdbSymbol=" O  "

 userNum="105"

 cartCoords="-5.303 7.365 -12.53"

/><atom

 id="112"

 symbol="O"

 pdbSymbol=" O  "

 userNum="106"

 cartCoords="1.092 18.004 -9.301"

/><atom

 id="117"

 symbol="O"

 pdbSymbol=" O  "

 userNum="107"

 cartCoords="-10.125 11.688 -6.73"

/><atom

 id="121"

 symbol="O"

 pdbSymbol=" O  "

 userNum="108"

 cartCoords="-16.52 1.05 -9.958"

/><atom

 id="126"

 symbol="O"

 pdbSymbol=" O  "

 userNum="109"

 cartCoords="-4.329 6.16 -14.587"

/><atom

 id="128"

 symbol="O"

 pdbSymbol=" O  "

 userNum="110"

 cartCoords="0.36 16.582 -7.282"

/><atom

 id="132"

 symbol="O"

 pdbSymbol=" O  "

 userNum="111"

 cartCoords="-11.099 12.894 -4.673"

/><atom

 id="134"

 symbol="O"

 pdbSymbol=" O  "

 userNum="112"

 cartCoords="-15.787 2.471 -11.978"

/><atom

 id="138"

 symbol="O"

 pdbSymbol=" O  "

 userNum="113"

 cartCoords="-8.304 3.302 -3.137"

/><atom

 id="143"

 symbol="O"

 pdbSymbol=" O  "

 userNum="114"

 cartCoords="-0.143 14.197 -6.378"

/><atom

 id="147"

 symbol="O"

 pdbSymbol=" O  "

 userNum="115"

 cartCoords="-7.124 15.751 -16.123"

/><atom

 id="152"

 symbol="O"

 pdbSymbol=" O  "

 userNum="116"

 cartCoords="-15.284 4.857 -12.882"

/><atom

 id="156"

 symbol="O"

 pdbSymbol=" O  "

 userNum="117"

 cartCoords="-3.854 1.499 -14.759"

/><atom

 id="159"

 symbol="O"

 pdbSymbol=" O  "

 userNum="118"

 cartCoords="0.744 11.91 -7.246"

/><atom

 id="163"

 symbol="O"

 pdbSymbol=" O  "

 userNum="119"

 cartCoords="-11.574 17.555 -4.501"

/><atom

 id="166"

 symbol="O"

 pdbSymbol=" O  "

 userNum="120"

 cartCoords="-16.171 7.143 -12.014"

/><atom

 id="170"

 symbol="O"

 pdbSymbol=" O  "

 userNum="121"

 cartCoords="-4.603 2.191 -12.349"

/><atom

 id="174"

 symbol="O"

 pdbSymbol=" O  "

 userNum="122"

 cartCoords="1.347 12.796 -9.633"

/><atom

 id="178"

 symbol="O"

 pdbSymbol=" O  "

 userNum="123"

 cartCoords="-10.825 16.863 -6.911"

/><atom

 id="182"

 symbol="O"

 pdbSymbol=" O  "

 userNum="124"

 cartCoords="-16.775 6.258 -9.627"

/><atom

 id="186"

 symbol="O"

 pdbSymbol=" O  "

 userNum="125"

 cartCoords="-4.897 4.788 -12.441"

/><atom

 id="189"

 symbol="O"

 pdbSymbol=" O  "

 userNum="126"

 cartCoords="1.163 15.4 -9.465"

/><atom

 id="192"

 symbol="O"

 pdbSymbol=" O  "

 userNum="127"

 cartCoords="-10.53 14.265 -6.818"

/><atom

 id="195"

 symbol="O"

 pdbSymbol=" O  "

 userNum="128"

 cartCoords="-16.591 3.654 -9.795"

/><atom

 id="198"

 symbol="O"

 pdbSymbol=" O  "

 userNum="129"

 cartCoords="-9.044 7.043 -14.315"

/><atom

 id="202"

 symbol="O"

 pdbSymbol=" O  "

 userNum="130"

 cartCoords="-13.654 16.72 -14.645"

/><atom

 id="206"

 symbol="O"

 pdbSymbol=" O  "

 userNum="131"

 cartCoords="-6.384 12.011 -4.945"

/><atom

 id="210"

 symbol="O"

 pdbSymbol=" O  "

 userNum="132"

 cartCoords="-1.773 2.333 -4.615"

/><atom

 id="214"

 symbol="O"

 pdbSymbol=" O  "

 userNum="133"

 cartCoords="-7.868 5.869 -16.303"

/><atom

 id="216"

 symbol="O"

 pdbSymbol=" O  "

 userNum="134"

 cartCoords="-14.591 15.295 -12.694"

/><atom

 id="219"

 symbol="O"

 pdbSymbol=" O  "

 userNum="135"

 cartCoords="-7.56 13.184 -2.956"

/><atom

 id="221"

 symbol="O"

 pdbSymbol=" O  "

 userNum="136"

 cartCoords="-0.836 3.758 -6.566"

/><atom

 id="224"

 symbol="O"

 pdbSymbol=" O  "

 userNum="137"

 cartCoords="-12.27 2.902 -4.921"

/><atom

 id="227"

 symbol="O"

 pdbSymbol=" O  "

 userNum="138"

 cartCoords="-14.654 12.879 -11.723"

/><atom

 id="230"

 symbol="O"

 pdbSymbol=" O  "

 userNum="139"

 cartCoords="-3.157 16.151 -14.339"

/><atom

 id="233"

 symbol="O"

 pdbSymbol=" O  "

 userNum="140"

 cartCoords="-0.773 6.175 -7.537"

/><atom

 id="236"

 symbol="O"

 pdbSymbol=" O  "

 userNum="141"

 cartCoords="-7.695 1.187 -16.262"

/><atom

 id="239"

 symbol="O"

 pdbSymbol=" O  "

 userNum="142"

 cartCoords="-13.907 10.664 -12.87"

/><atom

 id="243"

 symbol="O"

 pdbSymbol=" O  "

 userNum="143"

 cartCoords="-7.732 17.866 -2.998"

/><atom

 id="246"

 symbol="O"

 pdbSymbol=" O  "

 userNum="144"

 cartCoords="-1.521 8.39 -6.39"

/><atom

 id="250"

 symbol="O"

 pdbSymbol=" O  "

 userNum="145"

 cartCoords="-8.898 1.872 -14.036"

/><atom

 id="253"

 symbol="O"

 pdbSymbol=" O  "

 userNum="146"

 cartCoords="-12.855 11.62 -15.072"

/><atom

 id="256"

 symbol="O"

 pdbSymbol=" O  "

 userNum="147"

 cartCoords="-6.529 17.181 -5.224"

/><atom

 id="259"

 symbol="O"

 pdbSymbol=" O  "

 userNum="148"

 cartCoords="-2.573 7.433 -4.187"

/><atom

 id="262"

 symbol="O"

 pdbSymbol=" O  "

 userNum="149"

 cartCoords="-8.985 4.425 -14.457"

/><atom

 id="265"

 symbol="O"

 pdbSymbol=" O  "

 userNum="150"

 cartCoords="-13.235 14.133 -14.577"

/><atom

 id="268"

 symbol="O"

 pdbSymbol=" O  "

 userNum="151"

 cartCoords="-6.443 14.628 -4.802"

/><atom

 id="271"

 symbol="O"

 pdbSymbol=" O  "

 userNum="152"

 cartCoords="-2.193 4.921 -4.683"

/><atom

 id="274"

 symbol="O"

 pdbSymbol=" O  "

 userNum="153"

 cartCoords="-6.822 5.741 -13.899"

/><atom

 id="277"

 symbol="O"

 pdbSymbol=" O  "

 userNum="154"

 cartCoords="-15.603 15.047 -15.104"

/><atom

 id="279"

 symbol="O"

 pdbSymbol=" O  "

 userNum="155"

 cartCoords="-8.606 13.313 -5.361"

/><atom

 id="282"

 symbol="O"

 pdbSymbol=" O  "

 userNum="156"

 cartCoords="0.175 4.006 -4.156"

/><atom

 id="284"

 symbol="O"

 pdbSymbol=" O  "

 userNum="157"

 cartCoords="-6.357 1.337 -14.053"

/><atom

 id="287"

 symbol="O"

 pdbSymbol=" O  "

 userNum="158"

 cartCoords="-15.256 10.63 -15.077"

/><atom

 id="289"

 symbol="O"

 pdbSymbol=" O  "

 userNum="159"

 cartCoords="-9.071 17.716 -5.207"

/><atom

 id="292"

 symbol="O"

 pdbSymbol=" O  "

 userNum="160"

 cartCoords="-0.172 8.423 -4.182"

/><atom

 id="294"

 symbol="O"

 pdbSymbol=" O  "

 userNum="161"

 cartCoords="-4.64 8.173 -10.122"

/><atom

 id="297"

 symbol="O"

 pdbSymbol=" O  "

 userNum="162"

 cartCoords="0.286 18.746 -11.687"

/><atom

 id="300"

 symbol="O"

 pdbSymbol=" O  "

 userNum="163"

 cartCoords="-10.788 10.881 -9.138"

/><atom

 id="303"

 symbol="O"

 pdbSymbol=" O  "

 userNum="164"

 cartCoords="-15.714 0.308 -7.573"

/><atom

 id="306"

 symbol="O"

 pdbSymbol=" O  "

 userNum="165"

 cartCoords="-7.162 7.885 -10.74"

/><atom

 id="310"

 symbol="O"

 pdbSymbol=" O  "

 userNum="166"

 cartCoords="-15.668 17.307 -18.199"

/><atom

 id="313"

 symbol="O"

 pdbSymbol=" O  "

 userNum="167"

 cartCoords="-8.266 11.168 -8.52"

/><atom

 id="317"

 symbol="O"

 pdbSymbol=" O  "

 userNum="168"

 cartCoords="0.241 1.746 -1.061"

/><atom

 id="320"

 symbol="O"

 pdbSymbol=" O  "

 userNum="169"

 cartCoords="-9.511 7.247 -11.736"

/><atom

 id="323"

 symbol="O"

 pdbSymbol=" O  "

 userNum="170"

 cartCoords="-13.239 17.081 -17.216"

/><atom

 id="326"

 symbol="O"

 pdbSymbol=" O  "

 userNum="171"

 cartCoords="-5.917 11.806 -7.524"

/><atom

 id="329"

 symbol="O"

 pdbSymbol=" O  "

 userNum="172"

 cartCoords="-2.188 1.973 -2.044"

/><atom

 id="332"

 symbol="O"

 pdbSymbol=" O  "

 userNum="173"

 cartCoords="-4.194 3.599 -10.233"

/><atom

 id="335"

 symbol="O"

 pdbSymbol=" O  "

 userNum="174"

 cartCoords="0.683 14.166 -11.708"

/><atom

 id="338"

 symbol="O"

 pdbSymbol=" O  "

 userNum="175"

 cartCoords="-11.233 15.454 -9.027"

/><atom

 id="341"

 symbol="O"

 pdbSymbol=" O  "

 userNum="176"

 cartCoords="-16.111 4.887 -7.551"

/><atom

 id="344"

 symbol="O"

 pdbSymbol=" O  "

 userNum="177"

 cartCoords="-6.638 3.311 -11.156"

/><atom

 id="348"

 symbol="O"

 pdbSymbol=" O  "

 userNum="178"

 cartCoords="-15.348 12.704 -17.916"

/><atom

 id="351"

 symbol="O"

 pdbSymbol=" O  "

 userNum="179"

 cartCoords="-8.79 15.742 -8.104"

/><atom

 id="355"

 symbol="O"

 pdbSymbol=" O  "

 userNum="180"

 cartCoords="-0.08 6.349 -1.344"

/><atom

 id="358"

 symbol="O"

 pdbSymbol=" O  "

 userNum="181"

 cartCoords="-9.094 3.525 -12.009"

/><atom

 id="361"

 symbol="O"

 pdbSymbol=" O  "

 userNum="182"

 cartCoords="-12.97 13.339 -17.05"

/><atom

 id="364"

 symbol="O"

 pdbSymbol=" O  "

 userNum="183"

 cartCoords="-6.334 15.528 -7.251"

/><atom

 id="367"

 symbol="O"

 pdbSymbol=" O  "

 userNum="184"

 cartCoords="-2.458 5.715 -2.209"

/><atom

 id="370"

 symbol="O"

 pdbSymbol=" O  "

 userNum="185"

 cartCoords="-6.424 19.709 -12.781"

/><atom

 id="373"

 symbol="O"

 pdbSymbol=" O  "

 userNum="186"

 cartCoords="1.785 10.312 -8.983"

/><atom

 id="377"

 symbol="O"

 pdbSymbol=" O  "

 userNum="187"

 cartCoords="-9.004 -0.656 -6.479"

/><atom

 id="380"

 symbol="O"

 pdbSymbol=" O  "

 userNum="188"

 cartCoords="-17.213 8.741 -10.277"

/><atom

 id="384"

 symbol="O"

 pdbSymbol=" O  "

 userNum="189"

 cartCoords="-9.959 19.456 -14.119"

/><atom

 id="386"

 symbol="O"

 pdbSymbol=" O  "

 userNum="190"

 cartCoords="-13.178 9.072 -14.772"

/><atom

 id="389"

 symbol="O"

 pdbSymbol=" O  "

 userNum="191"

 cartCoords="-5.469 -0.403 -5.141"

/><atom

 id="391"

 symbol="O"

 pdbSymbol=" O  "

 userNum="192"

 cartCoords="-2.25 9.981 -4.488"

/><atom

 id="374"

 symbol="Si"

 pdbSymbol="Si  "

 userNum="193"

 cartCoords="1.534 8.76 -8.721"

/><atom

 id="371"

 objectColor="0xff00ffff"

 defaultColor="0xffd07592"

 objectColorIsApplied="yes"

 symbol="Si"

 pdbSymbol="Si  "

 userNum="194"

 cartCoords="-5.895 18.237 -13.086"

/><atom

 id="382"

 symbol="Si"

 pdbSymbol="Si  "

 userNum="195"

 cartCoords="-16.962 10.293 -10.538"

/><atom

 id="378"

 objectColor="0xff00ffff"

 defaultColor="0xffd07592"

 objectColorIsApplied="yes"

 symbol="Si"

 pdbSymbol="Si  "

 userNum="196"

 cartCoords="-9.533 0.817 -6.173"

/><atom

 id="396"

 symbol="Si"

 pdbSymbol="Si  "

 userNum="197"

 cartCoords="2.952 6.758 -10.519"

/><atom

 id="399"

 objectColor="0xff00ffff"

 defaultColor="0xffd07592"

 objectColorIsApplied="yes"

 symbol="Si"

 pdbSymbol="Si  "

 userNum="198"

 cartCoords="-6.918 15.959 -11.351"

/><atom

 id="403"

 symbol="Si"

 pdbSymbol="Si  "

 userNum="199"

 cartCoords="-18.379 12.295 -8.741"

/><atom

 id="408"

 objectColor="0xff00ffff"

 defaultColor="0xffd07592"

 objectColorIsApplied="yes"

 symbol="Si"

 pdbSymbol="Si  "

 userNum="200"

 cartCoords="-8.509 3.094 -7.909"

/><atom

 id="356"

 symbol="Si"

 pdbSymbol="Si  "

 userNum="201"

 cartCoords="-1.408 5.532 -1.028"

/><atom

 id="353"

 objectColor="0xff00ffff"

 defaultColor="0xffd07592"

 objectColorIsApplied="yes"

 symbol="Si"

 pdbSymbol="Si  "

 userNum="202"

 cartCoords="-7.336 15.19 -8.439"

/><atom

 id="349"

 symbol="Si"

 pdbSymbol="Si  "

 userNum="203"

 cartCoords="-14.019 13.522 -18.231"

/><atom

 id="345"

 objectColor="0xff00ffff"

 defaultColor="0xffd07592"

 objectColorIsApplied="yes"

 symbol="Si"

 pdbSymbol="Si  "

 userNum="204"

 cartCoords="-8.092 3.863 -10.82"

/><atom

 id="318"

 symbol="Si"

 pdbSymbol="Si  "

 userNum="205"

 cartCoords="-1.201 2.405 -0.865"

/><atom

 id="315"

 symbol="Si"

 pdbSymbol="Si  "

 userNum="206"

 cartCoords="-6.97 12.085 -8.693"

/><atom

 id="311"

 symbol="Si"

 pdbSymbol="Si  "

 userNum="207"

 cartCoords="-14.227 16.648 -18.395"

/><atom

 id="307"

 symbol="Si"

 pdbSymbol="Si  "

 userNum="208"

 cartCoords="-8.458 6.969 -10.566"

/><atom

 id="433"

 symbol="Si"

 pdbSymbol="Si  "

 userNum="209"

 cartCoords="3.468 2.023 -10.637"

/><atom

 id="436"

 symbol="Si"

 pdbSymbol="Si  "

 userNum="210"

 cartCoords="-6.562 11.208 -11.37"

/><atom

 id="8"

 symbol="Si"

 pdbSymbol="Si  "

 userNum="211"

 cartCoords="-18.896 17.03 -8.623"

/><atom

 id="13"

 symbol="Si"

 pdbSymbol="Si  "

 userNum="212"

 cartCoords="-8.865 7.845 -7.89"

/><atom

 id="445"

 symbol="Si"

 pdbSymbol="Si  "

 userNum="213"

 cartCoords="1.974 4.259 -8.871"

/><atom

 id="450"

 symbol="Si"

 pdbSymbol="Si  "

 userNum="214"

 cartCoords="-5.505 13.729 -13.067"

/><atom

 id="454"

 symbol="Si"

 pdbSymbol="Si  "

 userNum="215"

 cartCoords="-17.401 14.794 -10.389"

/><atom

 id="457"

 symbol="Si"

 pdbSymbol="Si  "

 userNum="216"

 cartCoords="-9.922 5.325 -6.193"

/><atom

 id="32"

 symbol="Si"

 pdbSymbol="Si  "

 userNum="217"

 cartCoords="-12.764 7.623 -14.238"

/><atom

 id="37"

 symbol="Si"

 pdbSymbol="Si  "

 userNum="218"

 cartCoords="-10.102 17.971 -14.695"

/><atom

 id="41"

 symbol="Si"

 pdbSymbol="Si  "

 userNum="219"

 cartCoords="-2.663 11.431 -5.022"

/><atom

 id="44"

 symbol="Si"

 pdbSymbol="Si  "

 userNum="220"

 cartCoords="-5.325 1.082 -4.565"

/><atom

 id="473"

 symbol="Si"

 pdbSymbol="Si  "

 userNum="221"

 cartCoords="-12.674 5.377 -16.397"

/><atom

 id="478"

 symbol="Si"

 pdbSymbol="Si  "

 userNum="222"

 cartCoords="-9.776 15.686 -12.601"

/><atom

 id="482"

 symbol="Si"

 pdbSymbol="Si  "

 userNum="223"

 cartCoords="-2.754 13.677 -2.863"

/><atom

 id="485"

 symbol="Si"

 pdbSymbol="Si  "

 userNum="224"

 cartCoords="-5.652 3.368 -6.659"

/><atom

 id="68"

 symbol="Si"

 pdbSymbol="Si  "

 userNum="225"

 cartCoords="-15.563 4.177 -6.242"

/><atom

 id="75"

 symbol="Si"

 pdbSymbol="Si  "

 userNum="226"

 cartCoords="-11.646 14.694 -10.358"

/><atom

 id="80"

 symbol="Si"

 pdbSymbol="Si  "

 userNum="227"

 cartCoords="0.136 14.877 -13.018"

/><atom

 id="83"

 symbol="Si"

 pdbSymbol="Si  "

 userNum="228"

 cartCoords="-3.782 4.36 -8.902"

/><atom

 id="88"

 objectColor="0xff00ffff"

 defaultColor="0xffd07592"

 objectColorIsApplied="yes"

 symbol="Si"

 pdbSymbol="Si  "

 userNum="229"

 cartCoords="-15.279 1.087 -6.263"

/><atom

 id="95"

 symbol="Si"

 pdbSymbol="Si  "

 userNum="230"

 cartCoords="-11.362 11.605 -10.426"

/><atom

 id="100"

 objectColor="0xff00ffff"

 defaultColor="0xffd07592"

 objectColorIsApplied="yes"

 symbol="Si"

 pdbSymbol="Si  "

 userNum="231"

 cartCoords="-0.149 17.966 -12.997"

/><atom

 id="103"

 symbol="Si"

 pdbSymbol="Si  "

 userNum="232"

 cartCoords="-4.066 7.449 -8.834"

/><atom

 id="511"

 symbol="Si"

 pdbSymbol="Si  "

 userNum="233"

 cartCoords="-12.184 0.562 -16.431"

/><atom

 id="21"

 symbol="Si"

 pdbSymbol="Si  "

 userNum="234"

 cartCoords="-9.379 10.863 -12.707"

/><atom

 id="517"

 symbol="Si"

 pdbSymbol="Si  "

 userNum="235"

 cartCoords="-3.244 18.491 -2.829"

/><atom

 id="27"

 symbol="Si"

 pdbSymbol="Si  "

 userNum="236"

 cartCoords="-6.049 8.19 -6.553"

/><atom

 id="48"

 objectColor="0xff00ffff"

 defaultColor="0xffd07592"

 objectColorIsApplied="yes"

 symbol="Si"

 pdbSymbol="Si  "

 userNum="237"

 cartCoords="-12.421 2.919 -14.415"

/><atom

 id="55"

 symbol="Si"

 pdbSymbol="Si  "

 userNum="238"

 cartCoords="-9.581 13.28 -14.654"

/><atom

 id="60"

 objectColor="0xff00ffff"

 defaultColor="0xffd07592"

 objectColorIsApplied="yes"

 symbol="Si"

 pdbSymbol="Si  "

 userNum="239"

 cartCoords="-3.006 16.135 -4.845"

/><atom

 id="63"

 symbol="Si"

 pdbSymbol="Si  "

 userNum="240"

 cartCoords="-5.846 5.773 -4.606"

/><atom

 id="110"

 symbol="Si"

 pdbSymbol="Si  "

 userNum="241"

 cartCoords="-5.716 8.288 -11.299"

/><atom

 id="113"

 objectColor="0xff00ffff"

 defaultColor="0xffd07592"

 objectColorIsApplied="yes"

 symbol="Si"

 pdbSymbol="Si  "

 userNum="242"

 cartCoords="1.327 19.022 -10.504"

/><atom

 id="11"

 symbol="Si"

 pdbSymbol="Si  "

 userNum="243"

 cartCoords="-9.711 10.765 -7.961"

/><atom

 id="124"

 objectColor="0xff00ffff"

 defaultColor="0xffd07592"

 objectColorIsApplied="yes"

 symbol="Si"

 pdbSymbol="Si  "

 userNum="244"

 cartCoords="-16.755 0.032 -8.756"

/><atom

 id="108"

 symbol="Si"

 pdbSymbol="Si  "

 userNum="245"

 cartCoords="-5.341 6.01 -13.366"

/><atom

 id="115"

 objectColor="0xff00ffff"

 defaultColor="0xffd07592"

 objectColorIsApplied="yes"

 symbol="Si"

 pdbSymbol="Si  "

 userNum="246"

 cartCoords="1.379 16.655 -8.505"

/><atom

 id="119"

 symbol="Si"

 pdbSymbol="Si  "

 userNum="247"

 cartCoords="-10.087 13.043 -5.894"

/><atom

 id="122"

 objectColor="0xff00ffff"

 defaultColor="0xffd07592"

 objectColorIsApplied="yes"

 symbol="Si"

 pdbSymbol="Si  "

 userNum="248"

 cartCoords="-16.807 2.398 -10.755"

/><atom

 id="139"

 symbol="Si"

 pdbSymbol="Si  "

 userNum="249"

 cartCoords="-8.48 4.864 -3.413"

/><atom

 id="129"

 objectColor="0xff00ffff"

 defaultColor="0xffd07592"

 objectColorIsApplied="yes"

 symbol="Si"

 pdbSymbol="Si  "

 userNum="250"

 cartCoords="-0.254 15.756 -6.056"

/><atom

 id="150"

 symbol="Si"

 pdbSymbol="Si  "

 userNum="251"

 cartCoords="-6.947 14.19 -15.847"

/><atom

 id="136"

 objectColor="0xff00ffff"

 defaultColor="0xffd07592"

 objectColorIsApplied="yes"

 symbol="Si"

 pdbSymbol="Si  "

 userNum="252"

 cartCoords="-15.174 3.298 -13.204"

/><atom

 id="141"

 symbol="Si"

 pdbSymbol="Si  "

 userNum="253"

 cartCoords="-8.112 1.759 -3.49"

/><atom

 id="144"

 symbol="Si"

 pdbSymbol="Si  "

 userNum="254"

 cartCoords="-0.049 12.635 -6.07"

/><atom

 id="148"

 symbol="Si"

 pdbSymbol="Si  "

 userNum="255"

 cartCoords="-7.315 17.295 -15.77"

/><atom

 id="154"

 symbol="Si"

 pdbSymbol="Si  "

 userNum="256"

 cartCoords="-15.378 6.418 -13.19"

/><atom

 id="157"

 symbol="Si"

 pdbSymbol="Si  "

 userNum="257"

 cartCoords="-4.851 1.183 -13.557"

/><atom

 id="161"

 symbol="Si"

 pdbSymbol="Si  "

 userNum="258"

 cartCoords="1.778 11.816 -8.453"

/><atom

 id="164"

 symbol="Si"

 pdbSymbol="Si  "

 userNum="259"

 cartCoords="-10.577 17.87 -5.703"

/><atom

 id="167"

 symbol="Si"

 pdbSymbol="Si  "

 userNum="260"

 cartCoords="-17.206 7.238 -10.806"

/><atom

 id="172"

 symbol="Si"

 pdbSymbol="Si  "

 userNum="261"

 cartCoords="-5.093 3.482 -11.545"

/><atom

 id="175"

 symbol="Si"

 pdbSymbol="Si  "

 userNum="262"

 cartCoords="1.591 14.178 -10.398"

/><atom

 id="179"

 symbol="Si"

 pdbSymbol="Si  "

 userNum="263"

 cartCoords="-10.335 15.571 -7.715"

/><atom

 id="184"

 symbol="Si"

 pdbSymbol="Si  "

 userNum="264"

 cartCoords="-17.019 4.876 -8.862"

/><atom

 id="19"

 symbol="Si"

 pdbSymbol="Si  "

 userNum="265"

 cartCoords="-9.843 7.845 -13.187"

/><atom

 id="16"

 symbol="Si"

 pdbSymbol="Si  "

 userNum="266"

 cartCoords="-13.018 17.687 -15.747"

/><atom

 id="29"

 symbol="Si"

 pdbSymbol="Si  "

 userNum="267"

 cartCoords="-5.584 11.208 -6.073"

/><atom

 id="24"

 symbol="Si"

 pdbSymbol="Si  "

 userNum="268"

 cartCoords="-2.41 1.366 -3.513"

/><atom

 id="200"

 symbol="Si"

 pdbSymbol="Si  "

 userNum="269"

 cartCoords="-8.171 5.778 -14.74"

/><atom

 id="203"

 symbol="Si"

 pdbSymbol="Si  "

 userNum="270"

 cartCoords="-14.281 15.306 -14.259"

/><atom

 id="207"

 symbol="Si"

 pdbSymbol="Si  "

 userNum="271"

 cartCoords="-7.257 13.275 -4.52"

/><atom

 id="212"

 symbol="Si"

 pdbSymbol="Si  "

 userNum="272"

 cartCoords="-1.146 3.748 -5.001"

/><atom

 id="70"

 symbol="Si"

 pdbSymbol="Si  "

 userNum="273"

 cartCoords="-12.644 4.428 -5.261"

/><atom

 id="73"

 symbol="Si"

 pdbSymbol="Si  "

 userNum="274"

 cartCoords="-14.564 14.437 -11.338"

/><atom

 id="78"

 symbol="Si"

 pdbSymbol="Si  "

 userNum="275"

 cartCoords="-2.783 14.625 -13.999"

/><atom

 id="85"

 symbol="Si"

 pdbSymbol="Si  "

 userNum="276"

 cartCoords="-0.864 4.617 -7.922"

/><atom

 id="90"

 objectColor="0xff00ffff"

 defaultColor="0xffd07592"

 objectColorIsApplied="yes"

 symbol="Si"

 pdbSymbol="Si  "

 userNum="277"

 cartCoords="-12.417 1.33 -5.222"

/><atom

 id="93"

 symbol="Si"

 pdbSymbol="Si  "

 userNum="278"

 cartCoords="-14.222 11.351 -11.467"

/><atom

 id="98"

 objectColor="0xff00ffff"

 defaultColor="0xffd07592"

 objectColorIsApplied="yes"

 symbol="Si"

 pdbSymbol="Si  "

 userNum="279"

 cartCoords="-3.01 17.724 -14.038"

/><atom

 id="105"

 symbol="Si"

 pdbSymbol="Si  "

 userNum="280"

 cartCoords="-1.206 7.702 -7.793"

/><atom

 id="237"

 symbol="Si"

 pdbSymbol="Si  "

 userNum="281"

 cartCoords="-7.765 0.966 -14.691"

/><atom

 id="240"

 symbol="Si"

 pdbSymbol="Si  "

 userNum="282"

 cartCoords="-13.803 10.504 -14.446"

/><atom

 id="244"

 symbol="Si"

 pdbSymbol="Si  "

 userNum="283"

 cartCoords="-7.663 18.087 -4.569"

/><atom

 id="248"

 symbol="Si"

 pdbSymbol="Si  "

 userNum="284"

 cartCoords="-1.625 8.549 -4.814"

/><atom

 id="50"

 objectColor="0xff00ffff"

 defaultColor="0xffd07592"

 objectColorIsApplied="yes"

 symbol="Si"

 pdbSymbol="Si  "

 userNum="285"

 cartCoords="-9.501 3.248 -13.517"

/><atom

 id="53"

 symbol="Si"

 pdbSymbol="Si  "

 userNum="286"

 cartCoords="-12.515 13.098 -15.55"

/><atom

 id="58"

 objectColor="0xff00ffff"

 defaultColor="0xffd07592"

 objectColorIsApplied="yes"

 symbol="Si"

 pdbSymbol="Si  "

 userNum="287"

 cartCoords="-5.927 15.805 -5.743"

/><atom

 id="65"

 symbol="Si"

 pdbSymbol="Si  "

 userNum="288"

 cartCoords="-2.913 5.956 -3.71"

/><bond

 id="6"

 bondAtom1="7"

 bondAtom2="8"

 bondOrderType="0"

 bondOrder="1"

/><bond

 id="9"

 bondAtom1="10"

 bondAtom2="11"

 bondOrderType="0"

 bondOrder="1"

/><bond

 id="12"

 bondAtom1="10"

 bondAtom2="13"

 bondOrderType="0"

 bondOrder="1"

/><bond

 id="14"

 bondAtom1="15"

 bondAtom2="16"

 bondOrderType="0"

 bondOrder="1"

/><bond

 id="17"

 bondAtom1="18"

 bondAtom2="19"

 bondOrderType="0"

 bondOrder="1"

/><bond

 id="20"

 bondAtom1="18"

 bondAtom2="21"

 bondOrderType="0"

 bondOrder="1"

/><bond

 id="22"

 bondAtom1="23"

 bondAtom2="24"

 bondOrderType="0"

 bondOrder="1"

/><bond

 id="25"

 bondAtom1="26"

 bondAtom2="27"

 bondOrderType="0"

 bondOrder="1"

/><bond

 id="28"

 bondAtom1="26"

 bondAtom2="29"

 bondOrderType="0"

 bondOrder="1"

/><bond

 id="30"

 bondAtom1="31"

 bondAtom2="32"

 bondOrderType="0"

 bondOrder="1"

/><bond

 id="33"

 bondAtom1="31"

 bondAtom2="19"

 bondOrderType="0"

 bondOrder="1"

/><bond

 id="34"

 bondAtom1="35"

 bondAtom2="16"

 bondOrderType="0"

 bondOrder="1"

/><bond

 id="36"

 bondAtom1="35"

 bondAtom2="37"

 bondOrderType="0"

 bondOrder="1"

/><bond

 id="38"

 bondAtom1="39"

 bondAtom2="29"

 bondOrderType="0"

 bondOrder="1"

/><bond

 id="40"

 bondAtom1="39"

 bondAtom2="41"

 bondOrderType="0"

 bondOrder="1"

/><bond

 id="42"

 bondAtom1="43"

 bondAtom2="44"

 bondOrderType="0"

 bondOrder="1"

/><bond

 id="45"

 bondAtom1="43"

 bondAtom2="24"

 bondOrderType="0"

 bondOrder="1"

/><bond

 id="46"

 bondAtom1="47"

 bondAtom2="48"

 bondOrderType="0"

 bondOrder="1"

/><bond

 id="49"

 bondAtom1="47"

 bondAtom2="50"

 bondOrderType="0"

 bondOrder="1"

/><bond

 id="51"

 bondAtom1="52"

 bondAtom2="53"

 bondOrderType="0"

 bondOrder="1"

/><bond

 id="54"

 bondAtom1="52"

 bondAtom2="55"

 bondOrderType="0"

 bondOrder="1"

/><bond

 id="56"

 bondAtom1="57"

 bondAtom2="58"

 bondOrderType="0"

 bondOrder="1"

/><bond

 id="59"

 bondAtom1="57"

 bondAtom2="60"

 bondOrderType="0"

 bondOrder="1"

/><bond

 id="61"

 bondAtom1="62"

 bondAtom2="63"

 bondOrderType="0"

 bondOrder="1"

/><bond

 id="64"

 bondAtom1="62"

 bondAtom2="65"

 bondOrderType="0"

 bondOrder="1"

/><bond

 id="66"

 bondAtom1="67"

 bondAtom2="68"

 bondOrderType="0"

 bondOrder="1"

/><bond

 id="69"

 bondAtom1="67"

 bondAtom2="70"

 bondOrderType="0"

 bondOrder="1"

/><bond

 id="71"

 bondAtom1="72"

 bondAtom2="73"

 bondOrderType="0"

 bondOrder="1"

/><bond

 id="74"

 bondAtom1="72"

 bondAtom2="75"

 bondOrderType="0"

 bondOrder="1"

/><bond

 id="76"

 bondAtom1="77"

 bondAtom2="78"

 bondOrderType="0"

 bondOrder="1"

/><bond

 id="79"

 bondAtom1="77"

 bondAtom2="80"

 bondOrderType="0"

 bondOrder="1"

/><bond

 id="81"

 bondAtom1="82"

 bondAtom2="83"

 bondOrderType="0"

 bondOrder="1"

/><bond

 id="84"

 bondAtom1="82"

 bondAtom2="85"

 bondOrderType="0"

 bondOrder="1"

/><bond

 id="86"

 bondAtom1="87"

 bondAtom2="88"

 bondOrderType="0"

 bondOrder="1"

/><bond

 id="89"

 bondAtom1="87"

 bondAtom2="90"

 bondOrderType="0"

 bondOrder="1"

/><bond

 id="91"

 bondAtom1="92"

 bondAtom2="93"

 bondOrderType="0"

 bondOrder="1"

/><bond

 id="94"

 bondAtom1="92"

 bondAtom2="95"

 bondOrderType="0"

 bondOrder="1"

/><bond

 id="96"

 bondAtom1="97"

 bondAtom2="98"

 bondOrderType="0"

 bondOrder="1"

/><bond

 id="99"

 bondAtom1="97"

 bondAtom2="100"

 bondOrderType="0"

 bondOrder="1"

/><bond

 id="101"

 bondAtom1="102"

 bondAtom2="103"

 bondOrderType="0"

 bondOrder="1"

/><bond

 id="104"

 bondAtom1="102"

 bondAtom2="105"

 bondOrderType="0"

 bondOrder="1"

/><bond

 id="106"

 bondAtom1="107"

 bondAtom2="108"

 bondOrderType="0"

 bondOrder="1"

/><bond

 id="109"

 bondAtom1="107"

 bondAtom2="110"

 bondOrderType="0"

 bondOrder="1"

/><bond

 id="111"

 bondAtom1="112"

 bondAtom2="113"

 bondOrderType="0"

 bondOrder="1"

/><bond

 id="114"

 bondAtom1="112"

 bondAtom2="115"

 bondOrderType="0"

 bondOrder="1"

/><bond

 id="116"

 bondAtom1="117"

 bondAtom2="11"

 bondOrderType="0"

 bondOrder="1"

/><bond

 id="118"

 bondAtom1="117"

 bondAtom2="119"

 bondOrderType="0"

 bondOrder="1"

/><bond

 id="120"

 bondAtom1="121"

 bondAtom2="122"

 bondOrderType="0"

 bondOrder="1"

/><bond

 id="123"

 bondAtom1="121"

 bondAtom2="124"

 bondOrderType="0"

 bondOrder="1"

/><bond

 id="125"

 bondAtom1="126"

 bondAtom2="108"

 bondOrderType="0"

 bondOrder="1"

/><bond

 id="127"

 bondAtom1="128"

 bondAtom2="129"

 bondOrderType="0"

 bondOrder="1"

/><bond

 id="130"

 bondAtom1="128"

 bondAtom2="115"

 bondOrderType="0"

 bondOrder="1"

/><bond

 id="131"

 bondAtom1="132"

 bondAtom2="119"

 bondOrderType="0"

 bondOrder="1"

/><bond

 id="133"

 bondAtom1="134"

 bondAtom2="122"

 bondOrderType="0"

 bondOrder="1"

/><bond

 id="135"

 bondAtom1="134"

 bondAtom2="136"

 bondOrderType="0"

 bondOrder="1"

/><bond

 id="137"

 bondAtom1="138"

 bondAtom2="139"

 bondOrderType="0"

 bondOrder="1"

/><bond

 id="140"

 bondAtom1="138"

 bondAtom2="141"

 bondOrderType="0"

 bondOrder="1"

/><bond

 id="142"

 bondAtom1="143"

 bondAtom2="144"

 bondOrderType="0"

 bondOrder="1"

/><bond

 id="145"

 bondAtom1="143"

 bondAtom2="129"

 bondOrderType="0"

 bondOrder="1"

/><bond

 id="146"

 bondAtom1="147"

 bondAtom2="148"

 bondOrderType="0"

 bondOrder="1"

/><bond

 id="149"

 bondAtom1="147"

 bondAtom2="150"

 bondOrderType="0"

 bondOrder="1"

/><bond

 id="151"

 bondAtom1="152"

 bondAtom2="136"

 bondOrderType="0"

 bondOrder="1"

/><bond

 id="153"

 bondAtom1="152"

 bondAtom2="154"

 bondOrderType="0"

 bondOrder="1"

/><bond

 id="155"

 bondAtom1="156"

 bondAtom2="157"

 bondOrderType="0"

 bondOrder="1"

/><bond

 id="158"

 bondAtom1="159"

 bondAtom2="144"

 bondOrderType="0"

 bondOrder="1"

/><bond

 id="160"

 bondAtom1="159"

 bondAtom2="161"

 bondOrderType="0"

 bondOrder="1"

/><bond

 id="162"

 bondAtom1="163"

 bondAtom2="164"

 bondOrderType="0"

 bondOrder="1"

/><bond

 id="165"

 bondAtom1="166"

 bondAtom2="167"

 bondOrderType="0"

 bondOrder="1"

/><bond

 id="168"

 bondAtom1="166"

 bondAtom2="154"

 bondOrderType="0"

 bondOrder="1"

/><bond

 id="169"

 bondAtom1="170"

 bondAtom2="157"

 bondOrderType="0"

 bondOrder="1"

/><bond

 id="171"

 bondAtom1="170"

 bondAtom2="172"

 bondOrderType="0"

 bondOrder="1"

/><bond

 id="173"

 bondAtom1="174"

 bondAtom2="175"

 bondOrderType="0"

 bondOrder="1"

/><bond

 id="176"

 bondAtom1="174"

 bondAtom2="161"

 bondOrderType="0"

 bondOrder="1"

/><bond

 id="177"

 bondAtom1="178"

 bondAtom2="179"

 bondOrderType="0"

 bondOrder="1"

/><bond

 id="180"

 bondAtom1="178"

 bondAtom2="164"

 bondOrderType="0"

 bondOrder="1"

/><bond

 id="181"

 bondAtom1="182"

 bondAtom2="167"

 bondOrderType="0"

 bondOrder="1"

/><bond

 id="183"

 bondAtom1="182"

 bondAtom2="184"

 bondOrderType="0"

 bondOrder="1"

/><bond

 id="185"

 bondAtom1="186"

 bondAtom2="108"

 bondOrderType="0"

 bondOrder="1"

/><bond

 id="187"

 bondAtom1="186"

 bondAtom2="172"

 bondOrderType="0"

 bondOrder="1"

/><bond

 id="188"

 bondAtom1="189"

 bondAtom2="175"

 bondOrderType="0"

 bondOrder="1"

/><bond

 id="190"

 bondAtom1="189"

 bondAtom2="115"

 bondOrderType="0"

 bondOrder="1"

/><bond

 id="191"

 bondAtom1="192"

 bondAtom2="179"

 bondOrderType="0"

 bondOrder="1"

/><bond

 id="193"

 bondAtom1="192"

 bondAtom2="119"

 bondOrderType="0"

 bondOrder="1"

/><bond

 id="194"

 bondAtom1="195"

 bondAtom2="122"

 bondOrderType="0"

 bondOrder="1"

/><bond

 id="196"

 bondAtom1="195"

 bondAtom2="184"

 bondOrderType="0"

 bondOrder="1"

/><bond

 id="197"

 bondAtom1="198"

 bondAtom2="19"

 bondOrderType="0"

 bondOrder="1"

/><bond

 id="199"

 bondAtom1="198"

 bondAtom2="200"

 bondOrderType="0"

 bondOrder="1"

/><bond

 id="201"

 bondAtom1="202"

 bondAtom2="203"

 bondOrderType="0"

 bondOrder="1"

/><bond

 id="204"

 bondAtom1="202"

 bondAtom2="16"

 bondOrderType="0"

 bondOrder="1"

/><bond

 id="205"

 bondAtom1="206"

 bondAtom2="207"

 bondOrderType="0"

 bondOrder="1"

/><bond

 id="208"

 bondAtom1="206"

 bondAtom2="29"

 bondOrderType="0"

 bondOrder="1"

/><bond

 id="209"

 bondAtom1="210"

 bondAtom2="24"

 bondOrderType="0"

 bondOrder="1"

/><bond

 id="211"

 bondAtom1="210"

 bondAtom2="212"

 bondOrderType="0"

 bondOrder="1"

/><bond

 id="213"

 bondAtom1="214"

 bondAtom2="200"

 bondOrderType="0"

 bondOrder="1"

/><bond

 id="215"

 bondAtom1="216"

 bondAtom2="203"

 bondOrderType="0"

 bondOrder="1"

/><bond

 id="217"

 bondAtom1="216"

 bondAtom2="73"

 bondOrderType="0"

 bondOrder="1"

/><bond

 id="218"

 bondAtom1="219"

 bondAtom2="207"

 bondOrderType="0"

 bondOrder="1"

/><bond

 id="220"

 bondAtom1="221"

 bondAtom2="85"

 bondOrderType="0"

 bondOrder="1"

/><bond

 id="222"

 bondAtom1="221"

 bondAtom2="212"

 bondOrderType="0"

 bondOrder="1"

/><bond

 id="223"

 bondAtom1="224"

 bondAtom2="90"

 bondOrderType="0"

 bondOrder="1"

/><bond

 id="225"

 bondAtom1="224"

 bondAtom2="70"

 bondOrderType="0"

 bondOrder="1"

/><bond

 id="226"

 bondAtom1="227"

 bondAtom2="73"

 bondOrderType="0"

 bondOrder="1"

/><bond

 id="228"

 bondAtom1="227"

 bondAtom2="93"

 bondOrderType="0"

 bondOrder="1"

/><bond

 id="229"

 bondAtom1="230"

 bondAtom2="78"

 bondOrderType="0"

 bondOrder="1"

/><bond

 id="231"

 bondAtom1="230"

 bondAtom2="98"

 bondOrderType="0"

 bondOrder="1"

/><bond

 id="232"

 bondAtom1="233"

 bondAtom2="105"

 bondOrderType="0"

 bondOrder="1"

/><bond

 id="234"

 bondAtom1="233"

 bondAtom2="85"

 bondOrderType="0"

 bondOrder="1"

/><bond

 id="235"

 bondAtom1="236"

 bondAtom2="237"

 bondOrderType="0"

 bondOrder="1"

/><bond

 id="238"

 bondAtom1="239"

 bondAtom2="240"

 bondOrderType="0"

 bondOrder="1"

/><bond

 id="241"

 bondAtom1="239"

 bondAtom2="93"

 bondOrderType="0"

 bondOrder="1"

/><bond

 id="242"

 bondAtom1="243"

 bondAtom2="244"

 bondOrderType="0"

 bondOrder="1"

/><bond

 id="245"

 bondAtom1="246"

 bondAtom2="105"

 bondOrderType="0"

 bondOrder="1"

/><bond

 id="247"

 bondAtom1="246"

 bondAtom2="248"

 bondOrderType="0"

 bondOrder="1"

/><bond

 id="249"

 bondAtom1="250"

 bondAtom2="50"

 bondOrderType="0"

 bondOrder="1"

/><bond

 id="251"

 bondAtom1="250"

 bondAtom2="237"

 bondOrderType="0"

 bondOrder="1"

/><bond

 id="252"

 bondAtom1="253"

 bondAtom2="240"

 bondOrderType="0"

 bondOrder="1"

/><bond

 id="254"

 bondAtom1="253"

 bondAtom2="53"

 bondOrderType="0"

 bondOrder="1"

/><bond

 id="255"

 bondAtom1="256"

 bondAtom2="244"

 bondOrderType="0"

 bondOrder="1"

/><bond

 id="257"

 bondAtom1="256"

 bondAtom2="58"

 bondOrderType="0"

 bondOrder="1"

/><bond

 id="258"

 bondAtom1="259"

 bondAtom2="65"

 bondOrderType="0"

 bondOrder="1"

/><bond

 id="260"

 bondAtom1="259"

 bondAtom2="248"

 bondOrderType="0"

 bondOrder="1"

/><bond

 id="261"

 bondAtom1="262"

 bondAtom2="50"

 bondOrderType="0"

 bondOrder="1"

/><bond

 id="263"

 bondAtom1="262"

 bondAtom2="200"

 bondOrderType="0"

 bondOrder="1"

/><bond

 id="264"

 bondAtom1="265"

 bondAtom2="203"

 bondOrderType="0"

 bondOrder="1"

/><bond

 id="266"

 bondAtom1="265"

 bondAtom2="53"

 bondOrderType="0"

 bondOrder="1"

/><bond

 id="267"

 bondAtom1="268"

 bondAtom2="207"

 bondOrderType="0"

 bondOrder="1"

/><bond

 id="269"

 bondAtom1="268"

 bondAtom2="58"

 bondOrderType="0"

 bondOrder="1"

/><bond

 id="270"

 bondAtom1="271"

 bondAtom2="65"

 bondOrderType="0"

 bondOrder="1"

/><bond

 id="272"

 bondAtom1="271"

 bondAtom2="212"

 bondOrderType="0"

 bondOrder="1"

/><bond

 id="273"

 bondAtom1="274"

 bondAtom2="200"

 bondOrderType="0"

 bondOrder="1"

/><bond

 id="275"

 bondAtom1="274"

 bondAtom2="108"

 bondOrderType="0"

 bondOrder="1"

/><bond

 id="276"

 bondAtom1="277"

 bondAtom2="203"

 bondOrderType="0"

 bondOrder="1"

/><bond

 id="278"

 bondAtom1="279"

 bondAtom2="119"

 bondOrderType="0"

 bondOrder="1"

/><bond

 id="280"

 bondAtom1="279"

 bondAtom2="207"

 bondOrderType="0"

 bondOrder="1"

/><bond

 id="281"

 bondAtom1="282"

 bondAtom2="212"

 bondOrderType="0"

 bondOrder="1"

/><bond

 id="283"

 bondAtom1="284"

 bondAtom2="237"

 bondOrderType="0"

 bondOrder="1"

/><bond

 id="285"

 bondAtom1="284"

 bondAtom2="157"

 bondOrderType="0"

 bondOrder="1"

/><bond

 id="286"

 bondAtom1="287"

 bondAtom2="240"

 bondOrderType="0"

 bondOrder="1"

/><bond

 id="288"

 bondAtom1="289"

 bondAtom2="164"

 bondOrderType="0"

 bondOrder="1"

/><bond

 id="290"

 bondAtom1="289"

 bondAtom2="244"

 bondOrderType="0"

 bondOrder="1"

/><bond

 id="291"

 bondAtom1="292"

 bondAtom2="248"

 bondOrderType="0"

 bondOrder="1"

/><bond

 id="293"

 bondAtom1="294"

 bondAtom2="110"

 bondOrderType="0"

 bondOrder="1"

/><bond

 id="295"

 bondAtom1="294"

 bondAtom2="103"

 bondOrderType="0"

 bondOrder="1"

/><bond

 id="296"

 bondAtom1="297"

 bondAtom2="100"

 bondOrderType="0"

 bondOrder="1"

/><bond

 id="298"

 bondAtom1="297"

 bondAtom2="113"

 bondOrderType="0"

 bondOrder="1"

/><bond

 id="299"

 bondAtom1="300"

 bondAtom2="95"

 bondOrderType="0"

 bondOrder="1"

/><bond

 id="301"

 bondAtom1="300"

 bondAtom2="11"

 bondOrderType="0"

 bondOrder="1"

/><bond

 id="302"

 bondAtom1="303"

 bondAtom2="124"

 bondOrderType="0"

 bondOrder="1"

/><bond

 id="304"

 bondAtom1="303"

 bondAtom2="88"

 bondOrderType="0"

 bondOrder="1"

/><bond

 id="305"

 bondAtom1="306"

 bondAtom2="307"

 bondOrderType="0"

 bondOrder="1"

/><bond

 id="308"

 bondAtom1="306"

 bondAtom2="110"

 bondOrderType="0"

 bondOrder="1"

/><bond

 id="309"

 bondAtom1="310"

 bondAtom2="311"

 bondOrderType="0"

 bondOrder="1"

/><bond

 id="312"

 bondAtom1="313"

 bondAtom2="11"

 bondOrderType="0"

 bondOrder="1"

/><bond

 id="314"

 bondAtom1="313"

 bondAtom2="315"

 bondOrderType="0"

 bondOrder="1"

/><bond

 id="316"

 bondAtom1="317"

 bondAtom2="318"

 bondOrderType="0"

 bondOrder="1"

/><bond

 id="319"

 bondAtom1="320"

 bondAtom2="19"

 bondOrderType="0"

 bondOrder="1"

/><bond

 id="321"

 bondAtom1="320"

 bondAtom2="307"

 bondOrderType="0"

 bondOrder="1"

/><bond

 id="322"

 bondAtom1="323"

 bondAtom2="311"

 bondOrderType="0"

 bondOrder="1"

/><bond

 id="324"

 bondAtom1="323"

 bondAtom2="16"

 bondOrderType="0"

 bondOrder="1"

/><bond

 id="325"

 bondAtom1="326"

 bondAtom2="315"

 bondOrderType="0"

 bondOrder="1"

/><bond

 id="327"

 bondAtom1="326"

 bondAtom2="29"

 bondOrderType="0"

 bondOrder="1"

/><bond

 id="328"

 bondAtom1="329"

 bondAtom2="24"

 bondOrderType="0"

 bondOrder="1"

/><bond

 id="330"

 bondAtom1="329"

 bondAtom2="318"

 bondOrderType="0"

 bondOrder="1"

/><bond

 id="331"

 bondAtom1="332"

 bondAtom2="172"

 bondOrderType="0"

 bondOrder="1"

/><bond

 id="333"

 bondAtom1="332"

 bondAtom2="83"

 bondOrderType="0"

 bondOrder="1"

/><bond

 id="334"

 bondAtom1="335"

 bondAtom2="80"

 bondOrderType="0"

 bondOrder="1"

/><bond

 id="336"

 bondAtom1="335"

 bondAtom2="175"

 bondOrderType="0"

 bondOrder="1"

/><bond

 id="337"

 bondAtom1="338"

 bondAtom2="75"

 bondOrderType="0"

 bondOrder="1"

/><bond

 id="339"

 bondAtom1="338"

 bondAtom2="179"

 bondOrderType="0"

 bondOrder="1"

/><bond

 id="340"

 bondAtom1="341"

 bondAtom2="184"

 bondOrderType="0"

 bondOrder="1"

/><bond

 id="342"

 bondAtom1="341"

 bondAtom2="68"

 bondOrderType="0"

 bondOrder="1"

/><bond

 id="343"

 bondAtom1="344"

 bondAtom2="345"

 bondOrderType="0"

 bondOrder="1"

/><bond

 id="346"

 bondAtom1="344"

 bondAtom2="172"

 bondOrderType="0"

 bondOrder="1"

/><bond

 id="347"

 bondAtom1="348"

 bondAtom2="349"

 bondOrderType="0"

 bondOrder="1"

/><bond

 id="350"

 bondAtom1="351"

 bondAtom2="179"

 bondOrderType="0"

 bondOrder="1"

/><bond

 id="352"

 bondAtom1="351"

 bondAtom2="353"

 bondOrderType="0"

 bondOrder="1"

/><bond

 id="354"

 bondAtom1="355"

 bondAtom2="356"

 bondOrderType="0"

 bondOrder="1"

/><bond

 id="357"

 bondAtom1="358"

 bondAtom2="50"

 bondOrderType="0"

 bondOrder="1"

/><bond

 id="359"

 bondAtom1="358"

 bondAtom2="345"

 bondOrderType="0"

 bondOrder="1"

/><bond

 id="360"

 bondAtom1="361"

 bondAtom2="349"

 bondOrderType="0"

 bondOrder="1"

/><bond

 id="362"

 bondAtom1="361"

 bondAtom2="53"

 bondOrderType="0"

 bondOrder="1"

/><bond

 id="363"

 bondAtom1="364"

 bondAtom2="353"

 bondOrderType="0"

 bondOrder="1"

/><bond

 id="365"

 bondAtom1="364"

 bondAtom2="58"

 bondOrderType="0"

 bondOrder="1"

/><bond

 id="366"

 bondAtom1="367"

 bondAtom2="65"

 bondOrderType="0"

 bondOrder="1"

/><bond

 id="368"

 bondAtom1="367"

 bondAtom2="356"

 bondOrderType="0"

 bondOrder="1"

/><bond

 id="369"

 bondAtom1="370"

 bondAtom2="371"

 bondOrderType="0"

 bondOrder="1"

/><bond

 id="372"

 bondAtom1="373"

 bondAtom2="374"

 bondOrderType="0"

 bondOrder="1"

/><bond

 id="375"

 bondAtom1="373"

 bondAtom2="161"

 bondOrderType="0"

 bondOrder="1"

/><bond

 id="376"

 bondAtom1="377"

 bondAtom2="378"

 bondOrderType="0"

 bondOrder="1"

/><bond

 id="379"

 bondAtom1="380"

 bondAtom2="167"

 bondOrderType="0"

 bondOrder="1"

/><bond

 id="381"

 bondAtom1="380"

 bondAtom2="382"

 bondOrderType="0"

 bondOrder="1"

/><bond

 id="383"

 bondAtom1="384"

 bondAtom2="37"

 bondOrderType="0"

 bondOrder="1"

/><bond

 id="385"

 bondAtom1="386"

 bondAtom2="240"

 bondOrderType="0"

 bondOrder="1"

/><bond

 id="387"

 bondAtom1="386"

 bondAtom2="32"

 bondOrderType="0"

 bondOrder="1"

/><bond

 id="388"

 bondAtom1="389"

 bondAtom2="44"

 bondOrderType="0"

 bondOrder="1"

/><bond

 id="390"

 bondAtom1="391"

 bondAtom2="41"

 bondOrderType="0"

 bondOrder="1"

/><bond

 id="392"

 bondAtom1="391"

 bondAtom2="248"

 bondOrderType="0"

 bondOrder="1"

/><bond

 id="393"

 bondAtom1="394"

 bondAtom2="374"

 bondOrderType="0"

 bondOrder="1"

/><bond

 id="395"

 bondAtom1="394"

 bondAtom2="396"

 bondOrderType="0"

 bondOrder="1"

/><bond

 id="397"

 bondAtom1="398"

 bondAtom2="399"

 bondOrderType="0"

 bondOrder="1"

/><bond

 id="400"

 bondAtom1="398"

 bondAtom2="371"

 bondOrderType="0"

 bondOrder="1"

/><bond

 id="401"

 bondAtom1="402"

 bondAtom2="403"

 bondOrderType="0"

 bondOrder="1"

/><bond

 id="404"

 bondAtom1="402"

 bondAtom2="382"

 bondOrderType="0"

 bondOrder="1"

/><bond

 id="405"

 bondAtom1="406"

 bondAtom2="378"

 bondOrderType="0"

 bondOrder="1"

/><bond

 id="407"

 bondAtom1="406"

 bondAtom2="408"

 bondOrderType="0"

 bondOrder="1"

/><bond

 id="409"

 bondAtom1="410"

 bondAtom2="396"

 bondOrderType="0"

 bondOrder="1"

/><bond

 id="411"

 bondAtom1="412"

 bondAtom2="399"

 bondOrderType="0"

 bondOrder="1"

/><bond

 id="413"

 bondAtom1="412"

 bondAtom2="353"

 bondOrderType="0"

 bondOrder="1"

/><bond

 id="414"

 bondAtom1="415"

 bondAtom2="403"

 bondOrderType="0"

 bondOrder="1"

/><bond

 id="416"

 bondAtom1="417"

 bondAtom2="345"

 bondOrderType="0"

 bondOrder="1"

/><bond

 id="418"

 bondAtom1="417"

 bondAtom2="408"

 bondOrderType="0"

 bondOrder="1"

/><bond

 id="419"

 bondAtom1="420"

 bondAtom2="356"

 bondOrderType="0"

 bondOrder="1"

/><bond

 id="421"

 bondAtom1="420"

 bondAtom2="318"

 bondOrderType="0"

 bondOrder="1"

/><bond

 id="422"

 bondAtom1="423"

 bondAtom2="315"

 bondOrderType="0"

 bondOrder="1"

/><bond

 id="424"

 bondAtom1="423"

 bondAtom2="353"

 bondOrderType="0"

 bondOrder="1"

/><bond

 id="425"

 bondAtom1="426"

 bondAtom2="311"

 bondOrderType="0"

 bondOrder="1"

/><bond

 id="427"

 bondAtom1="426"

 bondAtom2="349"

 bondOrderType="0"

 bondOrder="1"

/><bond

 id="428"

 bondAtom1="429"

 bondAtom2="345"

 bondOrderType="0"

 bondOrder="1"

/><bond

 id="430"

 bondAtom1="429"

 bondAtom2="307"

 bondOrderType="0"

 bondOrder="1"

/><bond

 id="431"

 bondAtom1="432"

 bondAtom2="433"

 bondOrderType="0"

 bondOrder="1"

/><bond

 id="434"

 bondAtom1="435"

 bondAtom2="436"

 bondOrderType="0"

 bondOrder="1"

/><bond

 id="437"

 bondAtom1="435"

 bondAtom2="315"

 bondOrderType="0"

 bondOrder="1"

/><bond

 id="438"

 bondAtom1="439"

 bondAtom2="8"

 bondOrderType="0"

 bondOrder="1"

/><bond

 id="440"

 bondAtom1="441"

 bondAtom2="307"

 bondOrderType="0"

 bondOrder="1"

/><bond

 id="442"

 bondAtom1="441"

 bondAtom2="13"

 bondOrderType="0"

 bondOrder="1"

/><bond

 id="443"

 bondAtom1="444"

 bondAtom2="445"

 bondOrderType="0"

 bondOrder="1"

/><bond

 id="446"

 bondAtom1="444"

 bondAtom2="433"

 bondOrderType="0"

 bondOrder="1"

/><bond

 id="447"

 bondAtom1="448"

 bondAtom2="436"

 bondOrderType="0"

 bondOrder="1"

/><bond

 id="449"

 bondAtom1="448"

 bondAtom2="450"

 bondOrderType="0"

 bondOrder="1"

/><bond

 id="451"

 bondAtom1="452"

 bondAtom2="8"

 bondOrderType="0"

 bondOrder="1"

/><bond

 id="453"

 bondAtom1="452"

 bondAtom2="454"

 bondOrderType="0"

 bondOrder="1"

/><bond

 id="455"

 bondAtom1="456"

 bondAtom2="457"

 bondOrderType="0"

 bondOrder="1"

/><bond

 id="458"

 bondAtom1="456"

 bondAtom2="13"

 bondOrderType="0"

 bondOrder="1"

/><bond

 id="459"

 bondAtom1="460"

 bondAtom2="445"

 bondOrderType="0"

 bondOrder="1"

/><bond

 id="461"

 bondAtom1="460"

 bondAtom2="396"

 bondOrderType="0"

 bondOrder="1"

/><bond

 id="462"

 bondAtom1="463"

 bondAtom2="399"

 bondOrderType="0"

 bondOrder="1"

/><bond

 id="464"

 bondAtom1="463"

 bondAtom2="450"

 bondOrderType="0"

 bondOrder="1"

/><bond

 id="465"

 bondAtom1="466"

 bondAtom2="403"

 bondOrderType="0"

 bondOrder="1"

/><bond

 id="467"

 bondAtom1="466"

 bondAtom2="454"

 bondOrderType="0"

 bondOrder="1"

/><bond

 id="468"

 bondAtom1="469"

 bondAtom2="457"

 bondOrderType="0"

 bondOrder="1"

/><bond

 id="470"

 bondAtom1="469"

 bondAtom2="408"

 bondOrderType="0"

 bondOrder="1"

/><bond

 id="471"

 bondAtom1="472"

 bondAtom2="473"

 bondOrderType="0"

 bondOrder="1"

/><bond

 id="474"

 bondAtom1="472"

 bondAtom2="32"

 bondOrderType="0"

 bondOrder="1"

/><bond

 id="475"

 bondAtom1="476"

 bondAtom2="37"

 bondOrderType="0"

 bondOrder="1"

/><bond

 id="477"

 bondAtom1="476"

 bondAtom2="478"

 bondOrderType="0"

 bondOrder="1"

/><bond

 id="479"

 bondAtom1="480"

 bondAtom2="41"

 bondOrderType="0"

 bondOrder="1"

/><bond

 id="481"

 bondAtom1="480"

 bondAtom2="482"

 bondOrderType="0"

 bondOrder="1"

/><bond

 id="483"

 bondAtom1="484"

 bondAtom2="485"

 bondOrderType="0"

 bondOrder="1"

/><bond

 id="486"

 bondAtom1="484"

 bondAtom2="44"

 bondOrderType="0"

 bondOrder="1"

/><bond

 id="487"

 bondAtom1="488"

 bondAtom2="473"

 bondOrderType="0"

 bondOrder="1"

/><bond

 id="489"

 bondAtom1="490"

 bondAtom2="75"

 bondOrderType="0"

 bondOrder="1"

/><bond

 id="491"

 bondAtom1="490"

 bondAtom2="478"

 bondOrderType="0"

 bondOrder="1"

/><bond

 id="492"

 bondAtom1="493"

 bondAtom2="482"

 bondOrderType="0"

 bondOrder="1"

/><bond

 id="494"

 bondAtom1="495"

 bondAtom2="485"

 bondOrderType="0"

 bondOrder="1"

/><bond

 id="496"

 bondAtom1="495"

 bondAtom2="83"

 bondOrderType="0"

 bondOrder="1"

/><bond

 id="497"

 bondAtom1="498"

 bondAtom2="68"

 bondOrderType="0"

 bondOrder="1"

/><bond

 id="499"

 bondAtom1="498"

 bondAtom2="88"

 bondOrderType="0"

 bondOrder="1"

/><bond

 id="500"

 bondAtom1="501"

 bondAtom2="95"

 bondOrderType="0"

 bondOrder="1"

/><bond

 id="502"

 bondAtom1="501"

 bondAtom2="75"

 bondOrderType="0"

 bondOrder="1"

/><bond

 id="503"

 bondAtom1="504"

 bondAtom2="100"

 bondOrderType="0"

 bondOrder="1"

/><bond

 id="505"

 bondAtom1="504"

 bondAtom2="80"

 bondOrderType="0"

 bondOrder="1"

/><bond

 id="506"

 bondAtom1="507"

 bondAtom2="83"

 bondOrderType="0"

 bondOrder="1"

/><bond

 id="508"

 bondAtom1="507"

 bondAtom2="103"

 bondOrderType="0"

 bondOrder="1"

/><bond

 id="509"

 bondAtom1="510"

 bondAtom2="511"

 bondOrderType="0"

 bondOrder="1"

/><bond

 id="512"

 bondAtom1="513"

 bondAtom2="95"

 bondOrderType="0"

 bondOrder="1"

/><bond

 id="514"

 bondAtom1="513"

 bondAtom2="21"

 bondOrderType="0"

 bondOrder="1"

/><bond

 id="515"

 bondAtom1="516"

 bondAtom2="517"

 bondOrderType="0"

 bondOrder="1"

/><bond

 id="518"

 bondAtom1="519"

 bondAtom2="27"

 bondOrderType="0"

 bondOrder="1"

/><bond

 id="520"

 bondAtom1="519"

 bondAtom2="103"

 bondOrderType="0"

 bondOrder="1"

/><bond

 id="521"

 bondAtom1="522"

 bondAtom2="511"

 bondOrderType="0"

 bondOrder="1"

/><bond

 id="523"

 bondAtom1="522"

 bondAtom2="48"

 bondOrderType="0"

 bondOrder="1"

/><bond

 id="524"

 bondAtom1="525"

 bondAtom2="55"

 bondOrderType="0"

 bondOrder="1"

/><bond

 id="526"

 bondAtom1="525"

 bondAtom2="21"

 bondOrderType="0"

 bondOrder="1"

/><bond

 id="527"

 bondAtom1="528"

 bondAtom2="60"

 bondOrderType="0"

 bondOrder="1"

/><bond

 id="529"

 bondAtom1="528"

 bondAtom2="517"

 bondOrderType="0"

 bondOrder="1"

/><bond

 id="530"

 bondAtom1="531"

 bondAtom2="27"

 bondOrderType="0"

 bondOrder="1"

/><bond

 id="532"

 bondAtom1="531"

 bondAtom2="63"

 bondOrderType="0"

 bondOrder="1"

/><bond

 id="533"

 bondAtom1="534"

 bondAtom2="473"

 bondOrderType="0"

 bondOrder="1"

/><bond

 id="535"

 bondAtom1="534"

 bondAtom2="48"

 bondOrderType="0"

 bondOrder="1"

/><bond

 id="536"

 bondAtom1="537"

 bondAtom2="55"

 bondOrderType="0"

 bondOrder="1"

/><bond

 id="538"

 bondAtom1="537"

 bondAtom2="478"

 bondOrderType="0"

 bondOrder="1"

/><bond

 id="539"

 bondAtom1="540"

 bondAtom2="60"

 bondOrderType="0"

 bondOrder="1"

/><bond

 id="541"

 bondAtom1="540"

 bondAtom2="482"

 bondOrderType="0"

 bondOrder="1"

/><bond

 id="542"

 bondAtom1="543"

 bondAtom2="485"

 bondOrderType="0"

 bondOrder="1"

/><bond

 id="544"

 bondAtom1="543"

 bondAtom2="63"

 bondOrderType="0"

 bondOrder="1"

/><bond

 id="545"

 bondAtom1="546"

 bondAtom2="473"

 bondOrderType="0"

 bondOrder="1"

/><bond

 id="547"

 bondAtom1="548"

 bondAtom2="478"

 bondOrderType="0"

 bondOrder="1"

/><bond

 id="549"

 bondAtom1="548"

 bondAtom2="399"

 bondOrderType="0"

 bondOrder="1"

/><bond

 id="550"

 bondAtom1="551"

 bondAtom2="482"

 bondOrderType="0"

 bondOrder="1"

/><bond

 id="552"

 bondAtom1="553"

 bondAtom2="408"

 bondOrderType="0"

 bondOrder="1"

/><bond

 id="554"

 bondAtom1="553"

 bondAtom2="485"

 bondOrderType="0"

 bondOrder="1"

/><bond

 id="555"

 bondAtom1="556"

 bondAtom2="511"

 bondOrderType="0"

 bondOrder="1"

/><bond

 id="557"

 bondAtom1="558"

 bondAtom2="21"

 bondOrderType="0"

 bondOrder="1"

/><bond

 id="559"

 bondAtom1="558"

 bondAtom2="436"

 bondOrderType="0"

 bondOrder="1"

/><bond

 id="560"

 bondAtom1="561"

 bondAtom2="517"

 bondOrderType="0"

 bondOrder="1"

/><bond

 id="562"

 bondAtom1="563"

 bondAtom2="13"

 bondOrderType="0"

 bondOrder="1"

/><bond

 id="564"

 bondAtom1="563"

 bondAtom2="27"

 bondOrderType="0"

 bondOrder="1"

/><bond

 id="565"

 bondAtom1="566"

 bondAtom2="105"

 bondOrderType="0"

 bondOrder="1"

/><bond

 id="567"

 bondAtom1="566"

 bondAtom2="374"

 bondOrderType="0"

 bondOrder="1"

/><bond

 id="568"

 bondAtom1="569"

 bondAtom2="371"

 bondOrderType="0"

 bondOrder="1"

/><bond

 id="570"

 bondAtom1="569"

 bondAtom2="98"

 bondOrderType="0"

 bondOrder="1"

/><bond

 id="571"

 bondAtom1="572"

 bondAtom2="382"

 bondOrderType="0"

 bondOrder="1"

/><bond

 id="573"

 bondAtom1="572"

 bondAtom2="93"

 bondOrderType="0"

 bondOrder="1"

/><bond

 id="574"

 bondAtom1="575"

 bondAtom2="90"

 bondOrderType="0"

 bondOrder="1"

/><bond

 id="576"

 bondAtom1="575"

 bondAtom2="378"

 bondOrderType="0"

 bondOrder="1"

/><bond

 id="577"

 bondAtom1="578"

 bondAtom2="154"

 bondOrderType="0"

 bondOrder="1"

/><bond

 id="579"

 bondAtom1="580"

 bondAtom2="148"

 bondOrderType="0"

 bondOrder="1"

/><bond

 id="581"

 bondAtom1="580"

 bondAtom2="371"

 bondOrderType="0"

 bondOrder="1"

/><bond

 id="582"

 bondAtom1="583"

 bondAtom2="144"

 bondOrderType="0"

 bondOrder="1"

/><bond

 id="584"

 bondAtom1="585"

 bondAtom2="378"

 bondOrderType="0"

 bondOrder="1"

/><bond

 id="586"

 bondAtom1="585"

 bondAtom2="141"

 bondOrderType="0"

 bondOrder="1"

/><bond

 id="587"

 bondAtom1="588"

 bondAtom2="154"

 bondOrderType="0"

 bondOrder="1"

/><bond

 id="589"

 bondAtom1="588"

 bondAtom2="32"

 bondOrderType="0"

 bondOrder="1"

/><bond

 id="590"

 bondAtom1="591"

 bondAtom2="37"

 bondOrderType="0"

 bondOrder="1"

/><bond

 id="592"

 bondAtom1="591"

 bondAtom2="148"

 bondOrderType="0"

 bondOrder="1"

/><bond

 id="593"

 bondAtom1="594"

 bondAtom2="41"

 bondOrderType="0"

 bondOrder="1"

/><bond

 id="595"

 bondAtom1="594"

 bondAtom2="144"

 bondOrderType="0"

 bondOrder="1"

/><bond

 id="596"

 bondAtom1="597"

 bondAtom2="141"

 bondOrderType="0"

 bondOrder="1"

/><bond

 id="598"

 bondAtom1="597"

 bondAtom2="44"

 bondOrderType="0"

 bondOrder="1"

/><bond

 id="599"

 bondAtom1="600"

 bondAtom2="85"

 bondOrderType="0"

 bondOrder="1"

/><bond

 id="601"

 bondAtom1="600"

 bondAtom2="445"

 bondOrderType="0"

 bondOrder="1"

/><bond

 id="602"

 bondAtom1="603"

 bondAtom2="450"

 bondOrderType="0"

 bondOrder="1"

/><bond

 id="604"

 bondAtom1="603"

 bondAtom2="78"

 bondOrderType="0"

 bondOrder="1"

/><bond

 id="605"

 bondAtom1="606"

 bondAtom2="454"

 bondOrderType="0"

 bondOrder="1"

/><bond

 id="607"

 bondAtom1="606"

 bondAtom2="73"

 bondOrderType="0"

 bondOrder="1"

/><bond

 id="608"

 bondAtom1="609"

 bondAtom2="70"

 bondOrderType="0"

 bondOrder="1"

/><bond

 id="610"

 bondAtom1="609"

 bondAtom2="457"

 bondOrderType="0"

 bondOrder="1"

/><bond

 id="611"

 bondAtom1="612"

 bondAtom2="445"

 bondOrderType="0"

 bondOrder="1"

/><bond

 id="613"

 bondAtom1="614"

 bondAtom2="150"

 bondOrderType="0"

 bondOrder="1"

/><bond

 id="615"

 bondAtom1="614"

 bondAtom2="450"

 bondOrderType="0"

 bondOrder="1"

/><bond

 id="616"

 bondAtom1="617"

 bondAtom2="454"

 bondOrderType="0"

 bondOrder="1"

/><bond

 id="618"

 bondAtom1="619"

 bondAtom2="457"

 bondOrderType="0"

 bondOrder="1"

/><bond

 id="620"

 bondAtom1="619"

 bondAtom2="139"

 bondOrderType="0"

 bondOrder="1"

/><bond

 id="621"

 bondAtom1="622"

 bondAtom2="136"

 bondOrderType="0"

 bondOrder="1"

/><bond

 id="623"

 bondAtom1="622"

 bondAtom2="48"

 bondOrderType="0"

 bondOrder="1"

/><bond

 id="624"

 bondAtom1="625"

 bondAtom2="55"

 bondOrderType="0"

 bondOrder="1"

/><bond

 id="626"

 bondAtom1="625"

 bondAtom2="150"

 bondOrderType="0"

 bondOrder="1"

/><bond

 id="627"

 bondAtom1="628"

 bondAtom2="60"

 bondOrderType="0"

 bondOrder="1"

/><bond

 id="629"

 bondAtom1="628"

 bondAtom2="129"

 bondOrderType="0"

 bondOrder="1"

/><bond

 id="630"

 bondAtom1="631"

 bondAtom2="139"

 bondOrderType="0"

 bondOrder="1"

/><bond

 id="632"

 bondAtom1="631"

 bondAtom2="63"

 bondOrderType="0"

 bondOrder="1"

/><bond

 id="633"

 bondAtom1="634"

 bondAtom2="433"

 bondOrderType="0"

 bondOrder="1"

/><bond

 id="635"

 bondAtom1="636"

 bondAtom2="436"

 bondOrderType="0"

 bondOrder="1"

/><bond

 id="637"

 bondAtom1="636"

 bondAtom2="110"

 bondOrderType="0"

 bondOrder="1"

/></group></fragment><fragment

 id="643"

 groupName="Fragment"

 groupID="1"

><atom

 id="667"

 atType="H"

 symbol="H"

 userNum="1189"

 cartCoords="-2.25748 16.1895 -9.73264"

/><atom

 id="675"

 atType="H"

 symbol="H"

 userNum="1192"

 cartCoords="-5.96262 13.1522 -8.92877"

/><atom

 id="673"

 atType="H"

 symbol="H"

 userNum="1191"

 cartCoords="-4.46685 14.6401 -10.2635"

/><atom

 id="671"

 atType="H"

 symbol="H"

 userNum="1190"

 cartCoords="-4.46913 15.1077 -8.50661"

/><atom

 id="645"

 objectColor="0xffffff00"

 defaultColor="0xffaaaaaa"

 objectColorIsApplied="yes"

 atType="C Alkene"

 symbol="C"

 userNum="1177"

 cartCoords="-0.452844 15.0334 -9.42183"

/><atom

 id="662"

 atType="H"

 symbol="H"

 userNum="1188"

 cartCoords="-2.81857 12.0492 -8.6303"

/><atom

 id="658"

 atType="H"

 symbol="H"

 userNum="1187"

 cartCoords="-0.344914 11.737 -8.5434"

/><atom

 id="654"

 atType="H"

 symbol="H"

 userNum="1186"

 cartCoords="1.17255 13.6513 -9.05092"

/><atom

 id="650"

 atType="H"

 symbol="H"

 userNum="1185"

 cartCoords="0.216186 15.8774 -9.64574"

/><atom

 id="669"

 objectColor="0xffffff00"

 defaultColor="0xffaaaaaa"

 objectColorIsApplied="yes"

 atType="C Alkane"

 symbol="C"

 userNum="1184"

 cartCoords="-4.85904 13.013 -8.89005"

/><atom

 id="664"

 objectColor="0xffffff00"

 defaultColor="0xffaaaaaa"

 objectColorIsApplied="yes"

 atType="C Alkane"

 symbol="C"

 userNum="1183"

 cartCoords="-4.16857 14.325 -9.23861"

/><atom

 id="648"

 objectColor="0xffffff00"

 defaultColor="0xffaaaaaa"

 objectColorIsApplied="yes"

 atType="C Alkene"

 symbol="C"

 userNum="1182"

 cartCoords="-1.83584 15.2079 -9.47043"

/><atom

 id="660"

 objectColor="0xffffff57"

 defaultColor="0xffaaaaaa"

 objectColorIsApplied="yes"

 atType="C Alkene"

 symbol="C"

 userNum="1181"

 cartCoords="-2.68424 14.1377 -9.18653"

/><atom

 id="656"

 objectColor="0xffffff00"

 defaultColor="0xffaaaaaa"

 objectColorIsApplied="yes"

 atType="C Alkene"

 symbol="C"

 userNum="1180"

 cartCoords="-2.14954 12.8931 -8.85413"

/><atom

 id="652"

 objectColor="0xffffff00"

 defaultColor="0xffaaaaaa"

 objectColorIsApplied="yes"

 atType="C Alkene"

 symbol="C"

 userNum="1179"

 cartCoords="-0.766544 12.7186 -8.80553"

/><atom

 id="646"

 objectColor="0xffffff00"

 defaultColor="0xffaaaaaa"

 objectColorIsApplied="yes"

 atType="C Alkene"

 symbol="C"

 userNum="1178"

 cartCoords="0.0818559 13.7888 -9.08933"

/><atom

 id="677"

 atType="H"

 symbol="H"

 userNum="1193"

 cartCoords="-4.55848 12.2303 -9.62205"

/><atom

 id="679"

 atType="H"

 symbol="H"

 userNum="1194"

 cartCoords="-4.56076 12.6979 -7.86512"

/><bond

 id="644"

 bondAtom1="645"

 bondAtom2="646"

 bondOrderType="15"

 bondOrder="2"

/><bond

 id="647"

 bondAtom1="645"

 bondAtom2="648"

 bondOrderType="15"

 bondOrder="1"

/><bond

 id="649"

 bondAtom1="645"

 bondAtom2="650"

 bondOrderType="0"

 bondOrder="1"

/><bond

 id="651"

 bondAtom1="646"

 bondAtom2="652"

 bondOrderType="15"

 bondOrder="1"

/><bond

 id="653"

 bondAtom1="646"

 bondAtom2="654"

 bondOrderType="0"

 bondOrder="1"

/><bond

 id="655"

 bondAtom1="652"

 bondAtom2="656"

 bondOrderType="15"

 bondOrder="2"

/><bond

 id="657"

 bondAtom1="652"

 bondAtom2="658"

 bondOrderType="0"

 bondOrder="1"

/><bond

 id="659"

 bondAtom1="656"

 bondAtom2="660"

 bondOrderType="15"

 bondOrder="1"

/><bond

 id="661"

 bondAtom1="656"

 bondAtom2="662"

 bondOrderType="0"

 bondOrder="1"

/><bond

 id="663"

 bondAtom1="660"

 bondAtom2="664"

 bondOrderType="0"

 bondOrder="1"

/><bond

 id="665"

 bondAtom1="660"

 bondAtom2="648"

 bondOrderType="15"

 bondOrder="2"

/><bond

 id="666"

 bondAtom1="648"

 bondAtom2="667"

 bondOrderType="0"

 bondOrder="1"

/><bond

 id="668"

 bondAtom1="664"

 bondAtom2="669"

 bondOrderType="0"

 bondOrder="1"

/><bond

 id="670"

 bondAtom1="664"

 bondAtom2="671"

 bondOrderType="0"

 bondOrder="1"

/><bond

 id="672"

 bondAtom1="664"

 bondAtom2="673"

 bondOrderType="0"

 bondOrder="1"

/><bond

 id="674"

 bondAtom1="669"

 bondAtom2="675"

 bondOrderType="0"

 bondOrder="1"

/><bond

 id="676"

 bondAtom1="669"

 bondAtom2="677"

 bondOrderType="0"

 bondOrder="1"

/><bond

 id="678"

 bondAtom1="669"

 bondAtom2="679"

 bondOrderType="0"

 bondOrder="1"

/></fragment><fragment

 id="680"

 groupName="Fragment"

 groupID="1.1.2"

><atom

 id="682"

 symbol="O"

 userNum="293"

 cartCoords="-5.11364 23.5897 -12.123"

 charge="-2"

 formalCharge="-2"

/><atom

 id="683"

 objectColor="0xff00ff00"

 defaultColor="0xff7f7f7f"

 objectColorIsApplied="yes"

 symbol="Mo"

 userNum="294"

 cartCoords="-5.11364 21.6497 -12.123"

 charge="6"

 formalCharge="6"

/><atom

 id="685"

 symbol="O"

 userNum="295"

 cartCoords="-6.79374 20.6797 -12.123"

 charge="-2"

 formalCharge="-2"

/><atom

 id="687"

 symbol="O"

 userNum="296"

 cartCoords="-3.33764 20.7052 -12.1031"

 charge="-2"

 formalCharge="-2"

/><atom

 id="689"

 objectColor="0xff00ff00"

 defaultColor="0xff7f7f7f"

 objectColorIsApplied="yes"

 symbol="Mo"

 userNum="298"

 cartCoords="-1.69784 21.3726 -12.264"

 charge="6"

 formalCharge="6"

/><atom

 id="691"

 symbol="O"

 userNum="297"

 cartCoords="-1.69784 23.3126 -12.264"

 charge="-2"

 formalCharge="-2"

/><atom

 id="693"

 symbol="O"

 userNum="300"

 cartCoords="-0.0177401 20.4026 -12.264"

 charge="-2"

 formalCharge="-2"

/><bond

 id="681"

 bondAtom1="682"

 bondAtom2="683"

 bondOrderType="0"

 bondOrder="1"

/><bond

 id="684"

 bondAtom1="683"

 bondAtom2="685"

 bondOrderType="0"

 bondOrder="1"

/><bond

 id="686"

 bondAtom1="683"

 bondAtom2="687"

 bondOrderType="0"

 bondOrder="1"

/><bond

 id="688"

 bondAtom1="687"

 bondAtom2="689"

 bondOrderType="0"

 bondOrder="1"

/><bond

 id="690"

 bondAtom1="691"

 bondAtom2="689"

 bondOrderType="0"

 bondOrder="1"

/><bond

 id="692"

 bondAtom1="689"

 bondAtom2="693"

 bondOrderType="0"

 bondOrder="1"

/></fragment><fragment

 id="694"

 groupName="Fragment"

 groupID="1.1"

><atom

 id="696"

 symbol="O"

 userNum="589"

 cartCoords="0.575388 20.5062 -7.92223"

 charge="-2"

 formalCharge="-2"

/><atom

 id="697"

 objectColor="0xff00ff00"

 defaultColor="0xff7f7f7f"

 objectColorIsApplied="yes"

 symbol="Mo"

 userNum="590"

 cartCoords="0.575388 18.5662 -7.92223"

 charge="6"

 formalCharge="6"

/><atom

 id="699"

 symbol="O"

 userNum="591"

 cartCoords="-1.10473 17.5962 -7.92223"

 charge="-2"

 formalCharge="-2"

/><atom

 id="701"

 symbol="O"

 userNum="592"

 cartCoords="2.25549 17.5962 -7.92223"

 charge="-2"

 formalCharge="-2"

/><bond

 id="695"

 bondAtom1="696"

 bondAtom2="697"

 bondOrderType="0"

 bondOrder="1"

/><bond

 id="698"

 bondAtom1="697"

 bondAtom2="699"

 bondOrderType="0"

 bondOrder="1"

/><bond

 id="700"

 bondAtom1="697"

 bondAtom2="701"

 bondOrderType="0"

 bondOrder="1"

/></fragment><fragment

 id="702"

 groupName="Fragment"

 groupID="1"

><atom

 id="704"

 symbol="O"

 userNum="881"

 cartCoords="4.02829 20.2303 -8.0372"

 charge="-2"

 formalCharge="-2"

/><atom

 id="705"

 objectColor="0xff00ff00"

 defaultColor="0xff7f7f7f"

 objectColorIsApplied="yes"

 symbol="Mo"

 userNum="882"

 cartCoords="4.02829 18.2903 -8.0372"

 charge="6"

 formalCharge="6"

/><atom

 id="707"

 symbol="O"

 userNum="883"

 cartCoords="2.34819 17.3203 -8.0372"

 charge="-2"

 formalCharge="-2"

/><atom

 id="709"

 symbol="O"

 userNum="884"

 cartCoords="5.80429 17.3458 -8.01728"

 charge="-2"

 formalCharge="-2"

/><bond

 id="703"

 bondAtom1="704"

 bondAtom2="705"

 bondOrderType="0"

 bondOrder="1"

/><bond

 id="706"

 bondAtom1="705"

 bondAtom2="707"

 bondOrderType="0"

 bondOrder="1"

/><bond

 id="708"

 bondAtom1="705"

 bondAtom2="709"

 bondOrderType="0"

 bondOrder="1"

/></fragment><fragment

 id="710"

 groupName="Fragment"

 groupID="1"

><atom

 id="712"

 symbol="O"

 userNum="1173"

 cartCoords="7.44409 19.9532 -8.17819"

 charge="-2"

 formalCharge="-2"

/><atom

 id="713"

 objectColor="0xff00ff00"

 defaultColor="0xff7f7f7f"

 objectColorIsApplied="yes"

 symbol="Mo"

 userNum="1174"

 cartCoords="7.44409 18.0132 -8.17819"

 charge="6"

 formalCharge="6"

/><atom

 id="715"

 symbol="O"

 userNum="1175"

 cartCoords="5.95589 17.0942 -8.13835"

 charge="-2"

 formalCharge="-2"

/><atom

 id="717"

 symbol="O"

 userNum="1176"

 cartCoords="9.12419 17.0432 -8.17819"

 charge="-2"

 formalCharge="-2"

/><bond

 id="711"

 bondAtom1="712"

 bondAtom2="713"

 bondOrderType="0"

 bondOrder="1"

/><bond

 id="714"

 bondAtom1="713"

 bondAtom2="715"

 bondOrderType="0"

 bondOrder="1"

/><bond

 id="716"

 bondAtom1="713"

 bondAtom2="717"

 bondOrderType="0"

 bondOrder="1"

/></fragment><group

 id="638"

 groupName="Solvent"

><fragment

 id="639"

 groupName="Fragment"

 groupID="1.1.1.1"

 isSolvent="yes"

><atom

 id="640"

 symbol="O"

 userNum="291"

 cartCoords="1.89593 4.84249 -11.2324"

 charge="-2"

 formalCharge="-2"

/></fragment><fragment

 id="641"

 groupName="Fragment"

 groupID="1.1.1"

 isSolvent="yes"

><atom

 id="642"

 symbol="O"

 userNum="289"

 cartCoords="3.57605 7.75249 -11.2324"

 charge="-2"

 formalCharge="-2"

/></fragment></group></group></model></C3XML>
